# Supplementary material for: Depression and anxiety in pet owners after a diagnosis of cancer in their pets: a cross-sectional study in Japan
Source: PubMed Central journal article supplement — BMJ Open. 2019 Feb 3;9(2):e024512. doi: 10.1136/bmjopen-2018-024512 (PMC6368008; doi:10.1136/bmjopen-2018-024512), 2019-02-03
Supplement: bmjopen-2018-024512.draft_revisions.pdf [file bmjopen-2018-024512.draft_revisions.pdf]

# BMJ Open

BMJ Open is committed to open peer review. As part of this commitment we make the peer review history of every article we publish publicly available.

When an article is published we post the peer reviewers' comments and the authors' responses online. We also post the versions of the paper that were used during peer review. These are the versions that the peer review comments apply to.

The versions of the paper that follow are the versions that were submitted during the peer review process. They are not the versions of record or the final published versions. They should not be cited or distributed as the published version of this manuscript.

BMJ Open is an open access journal and the full, final, typeset and author-corrected version of record of the manuscript is available on our site with no access controls, subscription charges or pay-per-view fees (<http://bmjopen.bmj.com>).

If you have any questions on BMJ Open's open peer review process please email [editorial.bmjopen@bmj.com](mailto:editorial.bmjopen@bmj.com)

# BMJ Open

## The psychological effects on pet owners after a diagnosis of cancer in their pets: a cross-sectional study

|                               |                                                                                                                                                                                                                                                                                                                                                                                                                                                                                                                                                                                                                                                                                                                                                                                                                                                                                                                                                                                                                                                                                                                                                                                                   |
|-------------------------------|---------------------------------------------------------------------------------------------------------------------------------------------------------------------------------------------------------------------------------------------------------------------------------------------------------------------------------------------------------------------------------------------------------------------------------------------------------------------------------------------------------------------------------------------------------------------------------------------------------------------------------------------------------------------------------------------------------------------------------------------------------------------------------------------------------------------------------------------------------------------------------------------------------------------------------------------------------------------------------------------------------------------------------------------------------------------------------------------------------------------------------------------------------------------------------------------------|
| Journal:                      | <i>BMJ Open</i>                                                                                                                                                                                                                                                                                                                                                                                                                                                                                                                                                                                                                                                                                                                                                                                                                                                                                                                                                                                                                                                                                                                                                                                   |
| Manuscript ID                 | bmjopen-2018-024512                                                                                                                                                                                                                                                                                                                                                                                                                                                                                                                                                                                                                                                                                                                                                                                                                                                                                                                                                                                                                                                                                                                                                                               |
| Article Type:                 | Research                                                                                                                                                                                                                                                                                                                                                                                                                                                                                                                                                                                                                                                                                                                                                                                                                                                                                                                                                                                                                                                                                                                                                                                          |
| Date Submitted by the Author: | 30-May-2018                                                                                                                                                                                                                                                                                                                                                                                                                                                                                                                                                                                                                                                                                                                                                                                                                                                                                                                                                                                                                                                                                                                                                                                       |
| Complete List of Authors:     | Nakano, Yuko; Japan Small Animal Cancer Center, ; Jikei University School of Medicine, Clinical Epidemiology<br>Matsushima, Masato; Jikei University School of Medicine, Division of Clinical Epidemiology<br>Nakamori, Azusa; Japan Small Animal Cancer Center<br>Hiroma, Junshiro; Minamino Veterinary Clinic<br>Matsuo, Eiji; Aster Animal Hopital<br>Wakabayashi, Hidetaka; Jikei University School of Medicine, Clinical Epidemiology; Yokohama City University Medical Center<br>Yoshida, Shuhei; Jikei University School of Medicine, Division of Clinical Epidemiology; Hiroshima University, Graduate School of Biomedical and Health Sciences<br>Ichikawa, Hiroko; Jikei University School of Medicine, Clinical Epidemiology; Eiju General Hospital<br>Kaneko, Makoto; Jikei University School of Medicine; Hamamatsu University School of Medicine<br>Mutai, Rieko; Jikei University School of Medicine, Clinical Epidemiology; Jikei University School of Nursing<br>Sugiyama, Yoshifumi; Jikei University School of Medicine; Tarama Clinic<br>Yoshida, Eriko; Jikei University School of Medicine; Kawasaki-Kyodo Hospital<br>Kobayashi, Tetsuya; Japan Small Animal Cancer Center |
| Keywords:                     | family practice, depression, anxiety, pet's cancer, family genogram                                                                                                                                                                                                                                                                                                                                                                                                                                                                                                                                                                                                                                                                                                                                                                                                                                                                                                                                                                                                                                                                                                                               |

SCHOLARONE™  
Manuscripts

**1 TITLE PAGE****2 Title****3 The psychological effects on pet owners after a diagnosis of cancer in their pets: a  
4 cross-sectional study****5 Authors**

6 Yuko Nakano <sup>1,2</sup>, Masato Matsushima <sup>2</sup>, Azusa Nakamori <sup>1</sup>, Junshiro Hiroma <sup>3</sup>, Eiji Matsuo <sup>4</sup>, Hidetaka  
7 Wakabayashi <sup>2,5</sup>, Shuhei Yoshida <sup>2,6</sup>, Hiroko Ichikawa <sup>2,7</sup>, Makoto Kaneko <sup>2,8</sup>, Rieko Mutai <sup>2,9</sup>,  
8 Yoshifumi Sugiyama <sup>2,10</sup>, Eriko Yoshida <sup>2,11</sup>, Tetsuya Kobayashi <sup>1</sup>

**9 Author affiliations**

- 10 1) Japan Small Animal Cancer Center, Tokorozawa, Japan
- 11 2) Division of Clinical Epidemiology, Jikei University School of Medicine, Tokyo, Japan
- 12 3) Minamino Veterinary Clinic, Hachioji, Japan
- 13 4) Aster Animal Hospital, Kawaguchi, Japan
- 14 5) Department of Rehabilitation Medicine, Yokohama City University Medical Center, Yokohama,  
15 Japan
- 16 6) Department of Community-Based Medical System, Graduate School of Biomedical and Health  
17 Sciences, Hiroshima University, Hiroshima, Japan
- 18 7) Division of Gastroenterology, Department of Internal Medicine, Eiju General Hospital, Tokyo, Japan
- 19 8) Department of Family and Community Medicine, Hamamatsu University School of Medicine,  
20 Hamamatsu, Japan
- 21 9) Jikei University School of Nursing, Chofu, Japan
- 22 10) Tarama clinic, Okinawa Miyako Hospital, Miyakojima, Japan
- 23 11) Kawasaki-Kyodo Hospital, Japanese Health and Welfare Co-operative Federation, Kawasaki, Japan

**25 Corresponding author**

26 Yuko Nakano

27 Japan Small Animal Cancer Center, 2-27-4, Nakatomi-Minami, Tokorozawa, Saitama 359-0003, Japan

28 Tel: +81-42-943-8699, Fax: +81-42-943-8698

29 Email: yuko-n@momo.so-net.ne.jp

**31 Word count**

32 3256

33

## 1 ABSTRACT

2 **Objective** To determine the presence and predictors of depression and anxiety in pet owners after a  
3 diagnosis of cancer in their pets.

4 **Design** Cross-sectional study.

5 **Setting** A veterinary medical center specialized in oncology for dogs and cats and two primary  
6 veterinary clinics in Japan.

7 **Participants** The participants were 99 owners of pets with a cancer diagnosis received in the past 1–3  
8 weeks and 94 owners of healthy pets.

9 **Main outcome measures** Self-reported questionnaires were used to assess depression and anxiety.  
10 Depression was assessed using the Center of Epidemiologic Studies Depression Scale, and anxiety was  
11 measured by using the State-Trait Anxiety Inventory-Form JYZ.

12 **Results** Depression scores were significantly higher in owners of pets with cancer even after adjustment  
13 for potential confounders in the multiple regression analysis ( $p < 0.001$ ). Among the owners of pets with  
14 cancer, those who were employed had a higher rate of depression than those who were unemployed ( $p =$   
15  $0.048$ ). State anxiety scores were significantly higher in owners of pets with cancer after adjustment for  
16 potential confounders, including trait-anxiety scores ( $p < 0.001$ ). Furthermore, in owners of pets with  
17 cancer, state anxiety was higher in owners with high trait anxiety ( $p < 0.001$ ) and in owners whose pets  
18 had a poor prognosis ( $p = 0.027$ ).

19 **Conclusion** The results indicate that some owners tended to become depressed and anxious after  
20 receiving a diagnosis of cancer in their pets. Employment may be a predictor of depression. High trait  
21 anxiety and a pet with a poor prognosis may increase owners' state anxiety. Including the pet in a family  
22 genogram and attention to the pet's health condition may be important considerations for family practice.

### 23 **Keywords**

24 family practice, depression, anxiety, pet's cancer, family genogram

1  
2  
3  
4  
5  
6  
7  
8  
9  
10  
11  
12  
13  
14  
15  
16  
17  
18  
19  
20  
21  
22  
23  
24  
25  
26  
27  
28  
29  
30  
31  
32  
33  
34  
35  
36  
37  
38  
39  
40  
41  
42  
43  
44  
45  
46  
47  
48  
49  
50  
51  
52  
53  
54  
55  
56  
57  
58  
59  
60

1 **Strengths and limitations of this study**

- 2 ● This is the first report investigating association between psychological effects on pet owners and a  
3 diagnosis of cancer in their pets.
- 4 ● This study is the interdisciplinary research between medicine and veterinary medicine, which has  
5 not been studied to date.
- 6 ● A limitation of this study is that it was conducted at a referral veterinary medical center specialized  
7 in oncology in an urban area.

For peer review only

## 1 Introduction

2 The majority of pet owners regard their companion animals as family members.[1] Companion animals  
3 often play an important role for individuals, couples, and families, and animals that become important  
4 family members can give patients being comfortable.[2] Conversely, mental and physical mourning after  
5 the loss of a domestic pet was first reported in 1977.[3] When the bond between humans and animals is  
6 strong, grief can be profound and the process of mourning can take a long time. It has been reported that  
7 more than 85 % of pet owners showed grief symptoms following the death of a companion animal, and  
8 over one third of pet owners continued to grieve after 6 months.[4] According to a cross-sectional survey  
9 in Canada, 27 % of pet owners experienced severe grief after the death of a companion animal.[5] Most  
10 reports on pet loss and bereavement have focused on individuals, but it is important to focus on family  
11 systems to determine how family members and social support affect owners' recovery from pet loss.[6]

12 The roles and responsibilities of family members of patients with cancer are significant because  
13 families are required to support and care for the patient and deal with social problems. Therefore, in many  
14 cases family members feel a great burden. A survey of families of patients with leukemia found that  
15 depression, measured by the Center for Epidemiologic Studies Depression Scale (CES-D), was higher  
16 than the healthy level.[7] Another study of families of cancer patients found that physical symptoms,  
17 anxiety and insomnia, social activity disorders, and depression tendency, measured by the General Health  
18 Questionnaire Mental Health Survey, were also above the healthy level.[8] In particular, it is clear that  
19 parents of childhood cancer patients experience high levels of anxiety and depression after they first  
20 receive the diagnosis,[9] although their poor mental state may be alleviated by psychosocial support.[10]

21 Improvement in veterinary medical care techniques in recent years means that companion animals are  
22 living longer and the majority of dogs now die from cancer.[11] Studies conducted in the UK and Japan  
23 reported that the most common cause of death in dogs was cancer.[12-14] Therefore, there is a high  
24 likelihood that pet owners will at some point receive a diagnosis of cancer in their pets. However, no  
25 study has investigated whether pet owners experience depression or anxiety after such a diagnosis. Our  
26 hypothesis is that owners of a dog or a cat diagnosed with cancer suffer depression and anxiety similar to  
27 that experienced by the family members of human cancer patients. Therefore, it is important to clarify the  
28 presence of anxiety and depression in pet owners after a diagnosis of cancer in their pets.

29 The aim of this study was to examine the psychological effects of owners being notified of a cancer  
30 diagnosis in their pets. We focused on the psychological state of pet owners when a dog or a cat was  
31 diagnosed with cancer by investigating the presence of anxiety and depression and exploring their  
32 predictors.

33

## 1 **Material and Methods**

### 2 **Study design and Setting**

3 The study design was a cross-sectional survey. Anxiety and depression symptoms were evaluated in  
4 pet owners after a dog or cat was diagnosed with cancer, and their scores were compared with those of  
5 owners of healthy dogs and cats. The survey was conducted between August 2013 and November 2016 at  
6 three veterinary clinics in Japan. Owners of pets with cancer were recruited from the Japan Small Animal  
7 Cancer Center (JSACC) and owners of healthy pets were recruited from the Minamino Veterinary Clinic  
8 and Aster Animal Hospital. The JSACC is a referral veterinary medical center specialized in oncology for  
9 dogs and cats located in Tokorozawa city, Saitama prefecture, adjacent to the capital Tokyo. A  
10 psychological counselor with a veterinarian license interviewed the pet owners at their first visit to the  
11 JSACC. The Minamino Veterinary Clinic and Aster Animal Hospital are primary veterinary clinics.  
12 When dogs and cats are diagnosed with cancer or suspected to have cancer at these two clinics, their  
13 owners can receive a referral to the JSACC if they wish. The Minamino Veterinary Clinic is located in  
14 Hachioji, Tokyo, and the Aster Animal Hospital is in Kawaguchi city, Saitama prefecture, and they are  
15 located approximately 25 Km and 20 Km from the JSACC, respectively.

### 16 **Participants**

#### 17 Owners of pets with cancer

18 Pet owners were asked to participate in the study 1–3 weeks after they received a notification of cancer  
19 at the JSACC. Cases in which the pet was unlikely to survive for more than a week were excluded. The  
20 date for recruiting participants was scheduled in advance and the participants were consecutively  
21 recruited on the survey day.

#### 22 Owners of healthy pets

23 Pet owners who visited the Minamino Veterinary Clinic or Aster Animal Hospital for preventive  
24 medicines such as vaccination, heartworm prevention, or health promotion were asked to participate in  
25 the study. Owners whose dog or cat had suffered from malignant tumors in the past or were currently  
26 suffering from severe illness including malignant tumor were excluded. The participants were  
27 intermittently recruited at both veterinary clinics.

28  
29 Both groups were targeted at owners over 20 years old.

### 31 **Measurement and Variables**

32 1) Main Outcome: Depression

1 Depressive symptoms were assessed using the Japanese version of the Center of Epidemiologic Studies  
2 Depression Scale (CES-D),[15] which is a self-report questionnaire developed by the National Institute of  
3 Mental Health for the purpose of identifying “depressive disorder” in people aged over 15 years.[16] The  
4 frequency of depressive symptoms in the week before the examination was assessed by classifying 20  
5 items into 4 levels (0 = rarely or never – less than 1 day, 1 = some or little time – 1–2 days, 2 =  
6 occasionally or a moderate amount of times – 3–4 days, and 3 = most or all the time – 5–7 days). Total  
7 scores range from 0 to 60 and higher scores indicate more severe depressive symptoms. A CES-D score  
8 of 16 or higher was considered to indicate probable depression.[16]

## 10 2) Main Outcome: State Anxiety

11 Anxiety was assessed using the Japanese version of the State-Trait Anxiety Inventory-Form JYZ  
12 (STAI-JYZ).[17] The STAI is a self-report questionnaire that measures anxiety as an emotional state  
13 (state anxiety) and as individual characteristics (trait anxiety).[18] It consists of 40 questions with 20  
14 items in each category and scores range from 20 to 80. Responses are given on a 4-point Likert scale.  
15 State-anxiety items measure the respondent’s anxiety level over the past two weeks, whereas trait-anxiety  
16 items measure the respondent’s characteristic anxiety level. Higher scores indicate greater anxiety. The  
17 state-anxiety score is classified into 5 grades (20≤35 = very low, 35 ≤45 = low, 45≤55 = moderate,  
18 55≤65=high, 65–80 = very high). Respondents who scored over 55 were defined as the high anxiety  
19 group.[18]

## 21 3) Predictor variables: characteristics of participants and pets

22 Age, gender, employment (employed or unemployed), animal species (dog or cat), caregiver (main or  
23 not main), number of people per household, number of animals per household, and bereavement  
24 experience with pets were obtained from a self-report questionnaire for all participants. The owners of  
25 pets with cancer were also asked about the pet’s prognosis (curable, survival for more than a year, from a  
26 few months to less than a year, or several weeks), and presence of symptoms (anorexia, pain, and  
27 neurological conditions including convulsion and respiratory distress).

## 29 **Study size**

30 Based on the hypothesis that pet owners have high levels of depression and state anxiety after receiving  
31 a diagnosis of cancer in their pets, the number of participants required was calculated in advance.  
32 Assuming state anxiety scores of 50 and 40 for owners of pets with cancer and owners with healthy pets,  
33 respectively, both each with a standard deviation of 11, we calculated the number of participants required



1 to identify a statistically significant difference as 26 in each group ( $\alpha = 0.05$ ,  $\beta = 0.10$ ). In a multiple  
2 regression model, 20 samples are required for one variable.[19] This study included 9 explanatory  
3 variables so 180 participants were required.

## 4 5 **Analysis and statistical methods**

6 Student's *t* test for parametric data and Wilcoxon's rank-sum test for nonparametric data were used to  
7 compare CES-D and state and trait-anxiety (STAI) scores between owners of pets with cancer and owners  
8 of healthy pets. Fisher's exact test was used to compare the proportion of CES-D score 16 or more for  
9 depression and proportion of STAI score 55 or more for state anxiety between owners of pets with cancer  
10 and owners with healthy pets.

11 Model 1: To evaluate the independent effects of cancer diagnosis on CES-D (model 1-CESD) and state  
12 anxiety (model1-STAI) scores, the regression model included gender, age, employment, animal species  
13 (dog or cat), caregiver, number of people/animals per household, bereavement experience with pets, and  
14 trait anxiety (model1-STAI only) as potential confounders. The variance inflation factor was calculated to  
15 check multicollinearity.

16 Model 2: To identify the factors associated with CES-D (model 2-CESD) and state anxiety (model  
17 2-STAI) scores in owners with pets with cancer, the regression model included pet's prognosis (life  
18 expectancy from a few months to less than a year, or several weeks), presence of clinical symptoms, and  
19 factors that had a *P* value of less than 0.2 in model 1.

20 *P* values of  $< 0.05$  were considered to be statistically significant.

21 CES-D questionnaires that contained more than five items with missing data were excluded from the  
22 data analysis. If the number of unanswered items was four items or less, the average value of the  
23 answered items was assigned.

24 Missing responses to the 20 questions used to calculate the state-anxiety score in the STAI  
25 questionnaire were dealt with in two ways: (1) the questionnaire was excluded from the data analysis; and  
26 (2) missing responses were assigned a score of 1 (low anxiety) for owners of pets with cancer and 4 (high  
27 anxiety) for owners of healthy pets. The two groups were compared using both methods.

28 All statistical analyses were performed using STATA/SE version 13.[20]

## 29 30 **Ethical considerations**

31 The research protocol was approved by the ethics committee of the Jikei University School of  
32 Medicine. YN and AN informed the owners of pets with cancer of the purpose and methods of the study  
33 and assured them that their privacy would be protected and that they would not be disadvantaged if they

1 did not agree to participate. Those who agreed to participate gave their signed consent. The personal  
2 information of owners of pets with cancer was anonymized and labeled with an identification code. The  
3 consolidated table was stored securely by YN at the JSACC. In addition, counseling and medical  
4 consultation were recommended for owners with high levels of depression and anxiety. Owners of  
5 healthy pets were provided with details of the research in a written document. If the owners of healthy  
6 pets answered the questionnaire anonymously, they were regarded as having consented to participate in  
7 the study.

## 9 **Results**

### 10 **Participants**

11 There were 193 participants in total: 99 owners of pets with cancer (cancer group) and 94 owners of  
12 healthy pets (healthy group). The participants' characteristics are shown in Table 1. The median period  
13 between notification of the cancer diagnosis and completion of the questionnaire survey in the cancer  
14 group was 14 days (7–21 days).

**Table 1 Characteristics of participants**

|                                  |                             | Cancer group | Healthy group |
|----------------------------------|-----------------------------|--------------|---------------|
| Number of participants           |                             | 99           | 94            |
| Age, median (range), y           |                             | 49 (21–75)   | 46 (22–70)    |
| Gender                           | Male, no. (%)               | 26 (26.3)    | 15 (16.0)     |
|                                  | Female, no. (%)             | 73 (73.7)    | 79 (84.0)     |
| Animal species                   | Dog, no. (%)                | 83 (83.8)    | 84 (89.4)     |
|                                  | Cat, no. (%)                | 16 (16.2)    | 10 (10.6)     |
| Employment                       | Employed, no. (%)           | 68 (68.7)    | 67 (71.3)     |
|                                  | Unemployed, no. (%)         | 31 (31.3)    | 27 (28.7)     |
| Caregiver                        | Main caregiver, no. (%)     | 83 (83.8)    | 84 (89.4)     |
|                                  | Not main caregiver, no. (%) | 16 (16.2)    | 10 (10.6)     |
| Number of people per household   | 1, no. (%)                  | 7 (7.1)      | 5 (5.3)       |
|                                  | 2+, no. (%)                 | 92 (92.9)    | 89 (94.7)     |
| Number of animals per household, | 1, no. (%)                  | 57 (57.6)    | 69 (73.4)     |
|                                  | 2+, no. (%)                 | 42 (42.4)    | 25 (26.6)     |
| Bereavement experience with pets | Yes, no. (%)                | 76 (76.8)    | 68 (72.3)     |

## Depression

Figure 1 plots the CES-D scores of the two groups. The median CES-D score was 13.34 (25–75 percentile: 7–23) in the cancer group (n=98) and 8 (25–75 percentile: 3–12) in the healthy group (n=94), respectively. The distribution of the two groups was significantly different (Wilcoxon rank-sum test:  $p < 0.001$ ). In addition, 39.8 % (39/98) of the cancer group scored 16 or higher on the CES-D, which was significantly higher than the proportion in the healthy group (11.7 % [11/94], Fisher's exact test:  $p < 0.001$ ). In the multiple regression analysis (model 1-CESD), CES-D scores were significantly higher in the cancer group even after adjustment for potential confounders ( $p < 0.001$ , Table 2). Among the cancer group, owners who were employed had significantly higher depression scores than those who were unemployed (model 2-CESD) ( $p < 0.048$ , Table 3).

**Table 2 Multiple regression analysis of CES-D scores (model 1-CESD).**

|                          | Coefficient | 95% Confidence interval |        | <i>p</i> value |
|--------------------------|-------------|-------------------------|--------|----------------|
| Pet with cancer          | 7.948       | 5.493                   | 10.403 | < 0.001        |
| Age                      | -0.038      | -0.149                  | 0.072  | 0.495          |
| Female                   | 2.601       | -0.722                  | 5.925  | 0.124          |
| Dog                      | 1.577       | -2.034                  | 5.188  | 0.390          |
| Employed                 | 3.045       | 0.310                   | 5.779  | 0.029          |
| Main caregiver           | -0.786      | -4.663                  | 3.091  | 0.690          |
| 2+ persons per household | 0.980       | -4.113                  | 6.074  | 0.705          |
| 2+ animals per household | -1.246      | -3.911                  | 1.418  | 0.357          |
| Bereavement of a pet     | -0.674      | -3.522                  | 2.172  | 0.641          |

**Table 3 Analysis of predictors associated with depression among the cancer group (model 2-CESD).**

|           | Coefficient | 95% Confidence interval |       | <i>p</i> value |
|-----------|-------------|-------------------------|-------|----------------|
| Female    | 3.799       | -0.602                  | 8.200 | 0.090          |
| Employed  | 4.224       | 0.029                   | 8.419 | 0.048          |
| Prognosis | 3.499       | -0.446                  | 7.445 | 0.081          |
| Symptoms  | -0.927      | -4.993                  | 3.139 | 0.652          |

**State Anxiety (STAI)**

The state-anxiety and trait-anxiety scores from the STAI in the two groups are shown in Figures 2A and 2B. For the cases in which all 20 questions for state anxiety were answered, the median state-anxiety score was 52 (25–75 percentile: 43–59) in the cancer group (n = 93) and 33 (25–75 percentile: 27–42) in the healthy group (n = 91), respectively. The distribution of the two groups was significantly different

(Wilcoxon rank-sum test:  $p < 0.001$ ). In addition, the proportion of owners with levels of high anxiety in the cancer group was 39.8 % (37/93), which was significantly higher than 0 % (0/91) in the healthy group (Fisher's exact test:  $p < 0.001$ ). Similarly, when missing values were imputed, the median state-anxiety score was 52 (25–75 percentile: 43–58) in the cancer group ( $n = 98$ ), which was significantly higher than 33.5 (25–75 percentile: 27–42) in the healthy group ( $n = 92$ ) ( $p < 0.001$ ). The median trait-anxiety score was 45 (25–75 percentile: 37–52.5) in the cancer group ( $n = 96$ ) and 34.5 (25–75 percentile: 27–42) in the healthy group ( $n = 90$ ). The distribution of the two groups was significantly different ( $p < 0.001$ ).

In the multiple regression model, after adjustment for potential confounders including trait-anxiety scores, state-anxiety scores were significantly higher in the cancer group (model 1-STAI) ( $p < 0.001$ , Table 4). Furthermore, in the cancer group, state-anxiety scores were higher in owners with high trait anxiety ( $p < 0.001$ ) and in those with pets with a life expectancy of several months (model 2-STAI) ( $p = 0.027$ , Table 5).

**Table 4 Multiple regression analysis of state-anxiety scores (model 1-STAI).**

|                          | Coefficient | 95% Confidence interval |        | <i>p</i> value |
|--------------------------|-------------|-------------------------|--------|----------------|
| Pet with cancer          | 11.056      | 8.510                   | 13.601 | < 0.001        |
| Age                      | -0.043      | -0.148                  | 0.060  | 0.409          |
| Female                   | -0.511      | -3.544                  | 2.522  | 0.740          |
| Dog                      | -0.849      | -4.160                  | 2.461  | 0.613          |
| Employed                 | 1.495       | -1.041                  | 4.032  | 0.246          |
| Main caregiver           | -0.387      | -3.939                  | 3.164  | 0.830          |
| 2+ persons per household | 3.676       | -0.886                  | 8.238  | 0.114          |
| 2+ animals per household | 0.463       | -2.050                  | 2.976  | 0.717          |
| Bereavement of a pet     | 1.388       | -1.216                  | 3.993  | 0.294          |
| Trait anxiety            | 0.654       | 0.546                   | 0.761  | < 0.001        |

**Table 5 Analysis of predictors associated with state anxiety among the cancer group (model 2-STAI).**

|               | Coefficient | 95% Confidence interval |        | <i>p</i> value |
|---------------|-------------|-------------------------|--------|----------------|
| Family        | 3.614       | -3.089                  | 10.319 | 0.287          |
| Trait anxiety | 0.570       | 0.405                   | 0.734  | < 0.001        |
| Prognosis     | 4.318       | 0.508                   | 8.128  | 0.027          |
| Symptoms      | 3.307       | -0.543                  | 7.157  | 0.091          |

## Discussion

The present study revealed high levels of anxiety and depression among pet owners after receiving a diagnosis of cancer in their pets. In addition, owners who were employed tended to be more depressed than those who were unemployed, and state anxiety was higher in owners with high trait anxiety and in owners of pets with a poor prognosis. This is the first report investigating association between psychological effects on pet owners and a diagnosis of cancer in their pets.

After being notified that their dog or cat had cancer, 39.8% of owners reported possible symptoms of depression. Two previous studies that investigated depression among family members of cancer patients using the CES-D found that 52.9% and 66.4% of families reported symptoms of depression, respectively.[21,22] Although pet owners were less likely to suffer depression than the family members of cancer patients, almost 40% were affected, which supports the hypothesis that dogs and cats are treated as members of the family.

Owners who were employed were more likely to report depression symptoms than those who were unemployed, possibly because they had insufficient time to care for their pets and take them to a veterinary clinic. Furthermore, a previous study reported that the median CES-D score of owners of pets with chronic or terminal diseases was 19.87,[23] which was higher than the median of 13.34 in this study, which was measured 1–3 weeks after the notification of cancer. Owners' depression may be sustained or increased by the need to provide long-term nursing care for their pets. Therefore, psychosocial support from the early stage after notification is necessary so that these owners do not develop maladjustment or mood disorder.

The median state-anxiety score among owners of pets with cancer was 52, which was significantly higher than the median of 33.5 among owners of healthy pets. Studies that have used the STAI to measure

1 anxiety in parents of children diagnosed with cancer reported average state-anxiety scores of 56.7 and  
2 52.7 for mothers and fathers, respectively.[24] The similarity in the state-anxiety scores of owners of pets  
3 with cancer suggests that dogs and cats may play a role as a member of the family. The reasons for such  
4 high anxiety among pet owners may include the cost of treatment, the burden of taking the pet to the  
5 clinic, providing nursing care, anxiety about mourning, and deterioration of clinical symptoms such as  
6 changes in the pet's appearance or increased pain.

7 In this study, anxiety was higher among owners who had a pet with a poor prognosis; i.e., with a life  
8 expectancy from several weeks to less than a year, suggesting that anxiety increases as the prospect of  
9 bereavement becomes more immediate. Furthermore, owners with high trait anxiety were more likely to  
10 suffer worse state anxiety than owners with low trait anxiety. A previous study revealed that cancer  
11 patients with high trait anxiety experience stronger psychological distress such as tension and anxiety  
12 after a diagnosis of cancer than patients with low trait anxiety.[25] Therefore, trait anxiety may be one  
13 factor that affects the state anxiety of owners when their pets are diagnosed with cancer. Moreover, trait  
14 anxiety scores in owners of pets with cancer were significantly higher than those in owners of healthy  
15 pets (45 vs. 34.5,  $p < 0.001$ ). Although trait anxiety is a personality trait that tends to cause anxiety and is  
16 relatively stable, the reason trait anxiety was high among owners of a pet with cancer may be that the  
17 situation in which the pet was diagnosed with cancer caused state anxiety, and this temporary mental state  
18 was fed back to the chronic personality tendency.

19 The results of our study indicate that companion animals are regarded as an important member of the  
20 family. When companion animals suffer from cancer, some pet owners suffer from depression and  
21 anxiety that could affect their health. Previous studies have noted that pets should be included in a family  
22 genogram.[26,27] Including pets in a family genogram may be useful for medical treatment in  
23 family-oriented care by family physicians. We propose that the following information about companion  
24 animals should be entered into the family genogram: name, age, animal species, current medical history,  
25 animal's prognosis and relationship with the family. Family physicians should pay attention to the health  
26 condition of companion animals. It is important not only for family physicians but also for psychiatrists to  
27 consider the possibility that owners of pets with cancer may be suffering from depression and anxiety and  
28 may need mental health care.

29 A limitation of this study is that it was conducted at a referral veterinary medical center specialized in  
30 oncology in an urban area. Therefore, we cannot rule out the possibility that originally enthusiastic  
31 owners and owners with a tendency toward depression and high trait anxiety were more likely to visit the  
32 referral veterinary medical center. In addition, because a screening test for depression was used in this  
33 study, it was uncertain whether the participants had developed an actual mental disorder. The progression

1 of depression and anxiety over the long term is also unknown, as the investigation took place 1–3 weeks  
2 after notification of the diagnosis. The detailed processes that cause depression and anxiety may be  
3 elucidated by investigating depression and anxiety in owners of pets diagnosed with cancer at primary  
4 veterinary clinics and monitoring them over time. Interventions such as counselling for pet owners after  
5 notification of a cancer diagnosis should also be evaluated.

## 6 7 **Conclusion**

8 Our findings indicate that some owners tended to become depressed and anxious after receiving a  
9 diagnosis of cancer in their pets. In particular, owners who were employed had a higher rate of depression  
10 than those who were unemployed, and state anxiety was higher in owners with high trait anxiety and in  
11 those whose pets had a poor prognosis. Physicians may find it helpful to include pets in the family  
12 genogram and to consider the pets' health condition when providing medical treatment in family practice.

## 13 14 **Acknowledgements**

15 We are grateful to Dr. Masamine Takanosu, Nasunogahara Veterinary Clinic, for his kind advice and  
16 critical reading of the manuscript. We also thank Dr. Takuto Segawa, Dr. Ryoko Yamato and Dr. Satomi  
17 Kajiwara for collecting the data. We are grateful to the pet owners who participated in this study. Finally,  
18 I (YN) would like to express my gratitude to my family for their warm encouragement.

## 19 20 **Footnotes**

## 21 **Contributors**

22 YN conceived and designed the study, analyzed and interpreted the data, and drafted a manuscript.  
23 MM contributed to conception and design of the study, analysis and interpretation of the data. AN, JH  
24 and EM contributed to conception of the study, acquisition of the data. HW, SY, HI, MK, RM, YS and  
25 EY contributed to interpretation of the data and discussion to help drafting the manuscript. TK  
26 contributed to conception of the study. All authors critically revised the manuscript. All authors approved  
27 the final version of the manuscript and agree to be accountable for the accuracy of the work. YN is the  
28 guarantor.

## 29 30 **Funding**

31 This study was supported by a grant for post-graduate students from Jikei University School of  
32 Medicine. The study sponsor had no role in the study design, data collection, analysis, or interpretation,  
33 writing the report, or the decision to submit the article for publication.



1

**2 Competing interests**

3 All authors have completed the ICMJE uniform disclosure form at [www.icmje.org/coi\\_disclosure.pdf](http://www.icmje.org/coi_disclosure.pdf)  
4 and declare: no support from any organization for the submitted work; MM is an adviser of Centre for  
5 Family Medicine Development practice-based research network, MM received lecture fee and travel fee  
6 for lecture from Centre for Family Medicine Development, MM received the grant from Japan Society for  
7 the Promotion of Science, MM is a Program Director of Jikei Clinical Research Program for  
8 Primary-care; no other relationships or activities that could appear to have influenced the submitted work.

9

**10 Patient consent**

11 Not required.

12

**13 Ethical approval**

14 The ethics committee of Jikei University School of Medicine approved study protocols.

15

**16 Provenance and peer review**

17 Not commissioned; externally peer reviewed.

18

**19 Data sharing statement**

20 No additional data are available.

21

22 This is an Open Access article distributed in accordance with the Creative Commons Attribution Non  
23 Commercial (CC BY-NC 4.0) license, which permits others to distribute, remix, adapt, build upon this  
24 work non-commercially, and license their derivative works on different terms, provided the original work  
25 is properly cited and the use is non-commercial. See: <http://creativecommons.org/licenses/by-nc/4.0/>.

26

27

28

29

30

31

32

33

34

35

36

37

38

## 1     **References**

- 2     1     Cohen SP. Can pets function as family members? *West J Nurs Res* 2002;24:621-38.
- 3     2     Walsh F. Human-animal bonds I: the relational significance of companion animals. *Fam Process*  
4     2009;48:462-80.
- 5     3     Keddie KM. Pathological mourning after the death of a domestic pet. *Br J Psychiatry*  
6     1977;131:21-25.
- 7     4     Wrobel TA, Dye AL. Grieving pet death: normative, gender, and attachment issues. *Omega*  
8     *(Westport)* 2003;47:385-93.
- 9     5     Adams CL, Bonnett BN, Meek AH. Predictors of owner response to companion animal death in 177  
10     clients from 14 practices in Ontario. *J Am Vet Med Assoc* 2000;217:1303-9.
- 11    6     Walsh F, McGoldrick M. Loss and the family: a systemic perspective. In: Walsh F, McGoldrick M,  
12     editors. *Living beyond loss: death in the family*. 2nd ed. WW Norton & Company, New York  
13     2004:3-26.
- 14    7     Shapiro J, Perez M, Warden MJ. The importance of family functioning to caregiver adaptation in  
15     mothers of child cancer patients: testing a social ecological model. *J Pediatr Oncol Nurs*  
16     1998;15:47-54.
- 17    8     Payne S, Smith P, Dean S. Identifying the concerns of informal carers in palliative care. *Palliat Med*  
18     1999;13:37-44.
- 19    9     Sawyer M, Antoniou G, Toogood I, et al. Childhood cancer: a 4-year prospective study of the  
20     psychological adjustment of children and parents. *J Pediatr Hematol Oncol* 2000;22:214-20.
- 21    10    Gerhardt CA, Compas BE, Connor JK, et al. Association of a mixed anxiety-depression syndrome  
22     and symptoms of major depressive disorder during adolescence. *J Youth Adolesc* 1999;28:305-23.
- 23    11    Fleming JM, Creevy KE, Promislow DE. Mortality in North American dogs from 1984 to 2004: an  
24     investigation into age-, size-, and breed-related causes of death. *J Vet Intern Med* 2011;25(2):187-98.
- 25    12    Adams VJ, Evans KM, Sampson J, et al. Methods and mortality results of a health survey of  
26     purebred dogs in the UK. *J Small Anim Pract* 2010;51:512-24.

- 1  
2  
3  
4  
5 1 O'Neill DG, Church DB, McGreevy PD, et al. Longevity and mortality of owned dogs in England.  
6 *Vet J* 2013;198:638-43.  
7  
8 2 14 Inoue M, Hasegawa A, Hosoi Y, et al. A current life table and causes of death for insured dogs in  
9 japan. *Prev Vet Med* 2015;120:210-8.  
10  
11 3 15 Shima S, Shikano T, Kitamura T, et al. A new self-rating depression scale. *Psychiatry* 1985;27:717-23.  
12  
13 4 (in Japanese)  
14  
15 5 16 Radloff LS. The CES-D scale a self-report depression scale for research in the general population. *Appl*  
16  
17 6 *Psychol Meas* 1977;1:385-401.  
18  
19 7 17 Hidano N, Fukuhara M, Iwawaki M, et al. Manual for the State-Trait Anxiety Inventory-Form JYZ.  
20  
21 8 Jitsumu Kyoiku-Shuppan 2000 (in Japanese).  
22  
23 9 18 Spielberger CD, Gorsuch RL, Lushene R, et al. Manual for the State-Trait Anxiety Inventory-Form  
24  
25 10 Y. Palo Alto, CA: Consulting Psychologists Press 1983.  
26  
27 11 19 Feinstein AR. Multivariable analysis: an introduction. Yale University Press 1996.  
28  
29 12 20 StataCorp. Stata Statistical Software: Release 13. College Station, StataCorp LP 2013.  
30  
31 13 21 Carter PA, Chang BL. Sleep and depression in cancer caregivers. *Cancer Nurs* 2000;23:410-5.  
32  
33 14 22 Papastavrou E, Charalambous A, Tsangari H. Exploring the other side of cancer care: the informal  
34  
35 15 23 Spitznagel MB, Jacobson DM, Cox MD, et al. Caregiver burden in owners of a sick companion  
36  
37 16 19 animal: A cross-sectional observational study. *Vet Rec* 2017;181:321.  
38  
39 17 24 Dahlquist LM, Czyzewski DI, Copeland KG, et al. Parents of children newly diagnosed with cancer:  
40  
41 18 anxiety, coping, and marital distress. *J Pediatr Psychol* 1993;18:365-76.  
42  
43 19 25 Ando N, Iwamitsu Y, Kuranami M, et al. Psychological characteristics and subjective symptoms as  
44  
45 20 23 determinants of psychological distress in patients prior to breast cancer diagnosis. *Support Care*  
46  
47 21 *Cancer* 2009;17:1361-70.  
48  
49 22 26 McGoldrick M, Gerson R, Petry S. Genograms: assessment and intervention. 3rd ed. WW Norton &  
50  
51 23 26 Company, New York 2008.  
52  
53 24 27 Walsh F. Human-animal bonds II: the role of pets in family systems and family therapy. *Fam*  
54  
55 25 *Process* 2009;48:481-99.  
56  
57  
58  
59  
60

1  
2  
3  
4  
5 **1 Figure 1. Distribution of CES-D scores in the healthy group and the cancer group.**

6  
7 **2** Solid line shows the median CES-D score in each group. Dotted line shows the cut-off point for  
8 **3** depression.  
9

10  
11 **5 Figure 2. Distribution of state-anxiety (A) and trait-anxiety (B) scores in the healthy group and the**  
12 **6 cancer group.** Solid lines show the median anxiety score in each group. A: the median state-anxiety  
13 **7** score is moderate in the cancer group, but very low in the healthy group. B: the median trait-anxiety score  
14 **8** in the cancer group is higher than in the healthy group.  
15  
16  
17  
18  
19  
20  
21  
22  
23  
24  
25  
26  
27  
28  
29  
30  
31  
32  
33  
34  
35  
36  
37  
38  
39  
40  
41  
42  
43  
44  
45  
46  
47  
48  
49  
50  
51  
52  
53  
54  
55  
56  
57  
58  
59  
60

1  
2  
3  
4  
5  
6  
7  
8  
9  
10  
11  
12  
13  
14  
15  
16  
17  
18  
19  
20  
21  
22  
23  
24  
25  
26  
27  
28  
29  
30  
31  
32  
33  
34  
35  
36  
37  
38  
39  
40  
41  
42  
43  
44  
45  
46  
47  
48  
49  
50  
51  
52  
53  
54  
55  
56  
57  
58  
59  
60

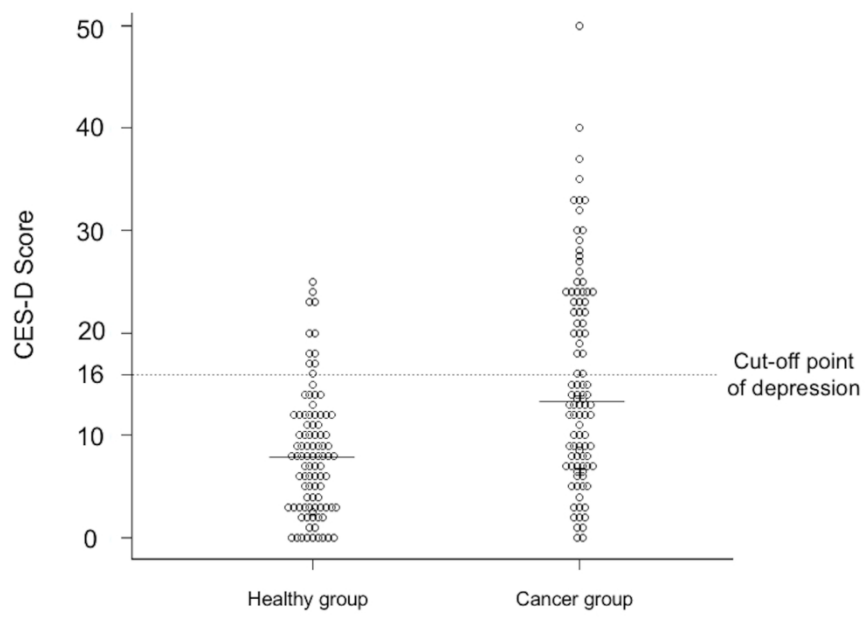

Figure 1. Distribution of CES-D scores in the healthy group and the cancer group. Solid line shows the median CES-D score in each group. Dotted line shows the cut-off point for depression.

67x50mm (600 x 600 DPI)

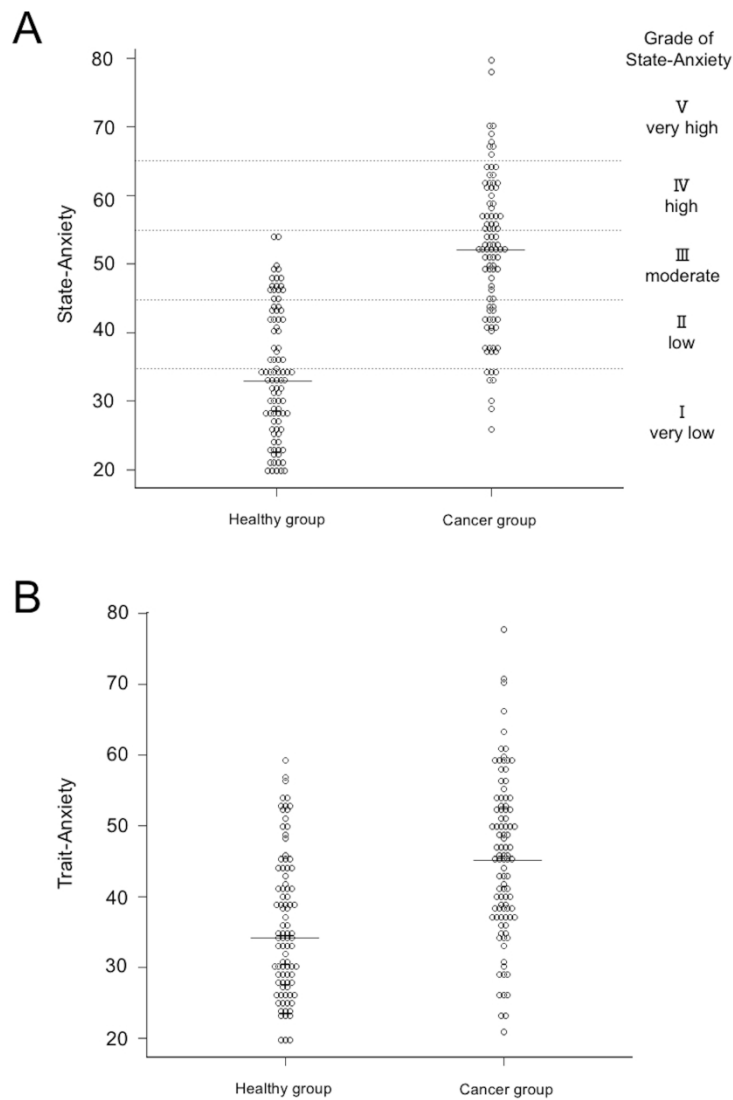

Figure 2. Distribution of state-anxiety (A) and trait-anxiety (B) scores in the healthy group and the cancer group. Solid lines show the median anxiety score in each group. A: the median state-anxiety score is moderate in the cancer group, but very low in the healthy group. B: the median trait-anxiety score in the cancer group is higher than in the healthy group.

134x201mm (600 x 600 DPI)

**STROBE 2007 (v4) Statement—Checklist of items that should be included in reports of *cross-sectional studies***

| Section/Topic             | Item # | Recommendation                                                                                                                                                                       | Reported on page # |
|---------------------------|--------|--------------------------------------------------------------------------------------------------------------------------------------------------------------------------------------|--------------------|
| <b>Title and abstract</b> | 1      | (a) Indicate the study’s design with a commonly used term in the title or the abstract                                                                                               | 1, 3               |
|                           |        | (b) Provide in the abstract an informative and balanced summary of what was done and what was found                                                                                  | 3                  |
| <b>Introduction</b>       |        |                                                                                                                                                                                      |                    |
| Background/rationale      | 2      | Explain the scientific background and rationale for the investigation being reported                                                                                                 | 4                  |
| Objectives                | 3      | State specific objectives, including any prespecified hypotheses                                                                                                                     | 4                  |
| <b>Methods</b>            |        |                                                                                                                                                                                      |                    |
| Study design              | 4      | Present key elements of study design early in the paper                                                                                                                              | 5                  |
| Setting                   | 5      | Describe the setting, locations, and relevant dates, including periods of recruitment, exposure, follow-up, and data collection                                                      | 5                  |
| Participants              | 6      | (a) Give the eligibility criteria, and the sources and methods of selection of participants                                                                                          | 5                  |
| Variables                 | 7      | Clearly define all outcomes, exposures, predictors, potential confounders, and effect modifiers. Give diagnostic criteria, if applicable                                             | 5, 6               |
| Data sources/ measurement | 8*     | For each variable of interest, give sources of data and details of methods of assessment (measurement). Describe comparability of assessment methods if there is more than one group | 5, 6               |
| Bias                      | 9      | Describe any efforts to address potential sources of bias                                                                                                                            | 7                  |
| Study size                | 10     | Explain how the study size was arrived at                                                                                                                                            | 6, 7               |
| Quantitative variables    | 11     | Explain how quantitative variables were handled in the analyses. If applicable, describe which groupings were chosen and why                                                         | 7                  |
| Statistical methods       | 12     | (a) Describe all statistical methods, including those used to control for confounding                                                                                                | 7                  |
|                           |        | (b) Describe any methods used to examine subgroups and interactions                                                                                                                  | N/A                |
|                           |        | (c) Explain how missing data were addressed                                                                                                                                          | 7                  |
|                           |        | (d) If applicable, describe analytical methods taking account of sampling strategy                                                                                                   | 9                  |
|                           |        | (e) Describe any sensitivity analyses                                                                                                                                                | N/A                |
| <b>Results</b>            |        |                                                                                                                                                                                      |                    |

|                          |     |                                                                                                                                                                                                              |               |
|--------------------------|-----|--------------------------------------------------------------------------------------------------------------------------------------------------------------------------------------------------------------|---------------|
| Participants             | 13* | (a) Report numbers of individuals at each stage of study—eg numbers potentially eligible, examined for eligibility, confirmed eligible, included in the study, completing follow-up, and analysed            | N/A           |
|                          |     | (b) Give reasons for non-participation at each stage                                                                                                                                                         | N/A           |
|                          |     | (c) Consider use of a flow diagram                                                                                                                                                                           | N/A           |
| Descriptive data         | 14* | (a) Give characteristics of study participants (eg demographic, clinical, social) and information on exposures and potential confounders                                                                     | 9             |
|                          |     | (b) Indicate number of participants with missing data for each variable of interest                                                                                                                          | 9             |
| Outcome data             | 15* | Report numbers of outcome events or summary measures                                                                                                                                                         | 9, 10, 11     |
| Main results             | 16  | (a) Give unadjusted estimates and, if applicable, confounder-adjusted estimates and their precision (eg, 95% confidence interval). Make clear which confounders were adjusted for and why they were included | 9, 10, 11, 12 |
|                          |     | (b) Report category boundaries when continuous variables were categorized                                                                                                                                    | N/A           |
|                          |     | (c) If relevant, consider translating estimates of relative risk into absolute risk for a meaningful time period                                                                                             | N/A           |
| Other analyses           | 17  | Report other analyses done—eg analyses of subgroups and interactions, and sensitivity analyses                                                                                                               | N/A           |
| <b>Discussion</b>        |     |                                                                                                                                                                                                              |               |
| Key results              | 18  | Summarise key results with reference to study objectives                                                                                                                                                     | 12            |
| Limitations              | 19  | Discuss limitations of the study, taking into account sources of potential bias or imprecision. Discuss both direction and magnitude of any potential bias                                                   | 13            |
| Interpretation           | 20  | Give a cautious overall interpretation of results considering objectives, limitations, multiplicity of analyses, results from similar studies, and other relevant evidence                                   | 13, 14        |
| Generalisability         | 21  | Discuss the generalisability (external validity) of the study results                                                                                                                                        | 13,14         |
| <b>Other information</b> |     |                                                                                                                                                                                                              |               |
| Funding                  | 22  | Give the source of funding and the role of the funders for the present study and, if applicable, for the original study on which the present article is based                                                | 14            |

\*Give information separately for cases and controls in case-control studies and, if applicable, for exposed and unexposed groups in cohort and cross-sectional studies.

**Note:** An Explanation and Elaboration article discusses each checklist item and gives methodological background and published examples of transparent reporting. The STROBE checklist is best used in conjunction with this article (freely available on the Web sites of PLoS Medicine at <http://www.plosmedicine.org/>, Annals of Internal Medicine at <http://www.annals.org/>, and Epidemiology at <http://www.epidem.com/>). Information on the STROBE Initiative is available at [www.strobe-statement.org](http://www.strobe-statement.org).



# BMJ Open

## Depression and anxiety in pet owners after a diagnosis of cancer in their pets: a cross-sectional study in Japan

|                                 |                                                                                                                                                                                                                                                                                                                                                                                                                                                                                                                                                                                                                                                                                                                                                                                                                                                                                                                                                                                                                                                                                                                                                                                                                                                                                                                                                                                               |
|---------------------------------|-----------------------------------------------------------------------------------------------------------------------------------------------------------------------------------------------------------------------------------------------------------------------------------------------------------------------------------------------------------------------------------------------------------------------------------------------------------------------------------------------------------------------------------------------------------------------------------------------------------------------------------------------------------------------------------------------------------------------------------------------------------------------------------------------------------------------------------------------------------------------------------------------------------------------------------------------------------------------------------------------------------------------------------------------------------------------------------------------------------------------------------------------------------------------------------------------------------------------------------------------------------------------------------------------------------------------------------------------------------------------------------------------|
| Journal:                        | <i>BMJ Open</i>                                                                                                                                                                                                                                                                                                                                                                                                                                                                                                                                                                                                                                                                                                                                                                                                                                                                                                                                                                                                                                                                                                                                                                                                                                                                                                                                                                               |
| Manuscript ID                   | bmjopen-2018-024512.R1                                                                                                                                                                                                                                                                                                                                                                                                                                                                                                                                                                                                                                                                                                                                                                                                                                                                                                                                                                                                                                                                                                                                                                                                                                                                                                                                                                        |
| Article Type:                   | Research                                                                                                                                                                                                                                                                                                                                                                                                                                                                                                                                                                                                                                                                                                                                                                                                                                                                                                                                                                                                                                                                                                                                                                                                                                                                                                                                                                                      |
| Date Submitted by the Author:   | 24-Oct-2018                                                                                                                                                                                                                                                                                                                                                                                                                                                                                                                                                                                                                                                                                                                                                                                                                                                                                                                                                                                                                                                                                                                                                                                                                                                                                                                                                                                   |
| Complete List of Authors:       | Nakano, Yuko; Japan Small Animal Cancer Center; The Jikei University School of Medicine, Division of Clinical Epidemiology<br>Matsushima, Masato; The Jikei University School of Medicine, Division of Clinical Epidemiology<br>Nakamori, Azusa; Japan Small Animal Cancer Center<br>Hiroma, Junshiro; Minamino Veterinary Clinic<br>Matsuo, Eiji; Aster Animal Hospital<br>Wakabayashi, Hidetaka; The Jikei University School of Medicine, Division of Clinical Epidemiology; Yokohama City University Medical Center<br>Yoshida, Shuhei; The Jikei University School of Medicine, Division of Clinical Epidemiology; Hiroshima University, Graduate School of Biomedical and Health Sciences<br>Ichikawa, Hiroko; The Jikei University School of Medicine, Division of Clinical Epidemiology; Eiju General Hospital<br>Kaneko, Makoto; The Jikei University School of Medicine, Division of Clinical Epidemiology; Hamamatsu University School of Medicine<br>Mutai, Rieko; The Jikei University School of Medicine, Division of Clinical Epidemiology; Jikei University School of Nursing<br>Sugiyama, Yoshifumi; The Jikei University School of Medicine, Division of Clinical Epidemiology; Tarama Clinic<br>Yoshida, Eriko; The Jikei University School of Medicine, Division of Clinical Epidemiology; Kawasaki-Kyodo Hospital<br>Kobayashi, Tetsuya; Japan Small Animal Cancer Center |
| <b>Primary Subject Heading</b>: | General practice / Family practice                                                                                                                                                                                                                                                                                                                                                                                                                                                                                                                                                                                                                                                                                                                                                                                                                                                                                                                                                                                                                                                                                                                                                                                                                                                                                                                                                            |
| Secondary Subject Heading:      | General practice / Family practice                                                                                                                                                                                                                                                                                                                                                                                                                                                                                                                                                                                                                                                                                                                                                                                                                                                                                                                                                                                                                                                                                                                                                                                                                                                                                                                                                            |
| Keywords:                       | family practice, depression, anxiety, pet cancer, family genogram                                                                                                                                                                                                                                                                                                                                                                                                                                                                                                                                                                                                                                                                                                                                                                                                                                                                                                                                                                                                                                                                                                                                                                                                                                                                                                                             |
|                                 |                                                                                                                                                                                                                                                                                                                                                                                                                                                                                                                                                                                                                                                                                                                                                                                                                                                                                                                                                                                                                                                                                                                                                                                                                                                                                                                                                                                               |

SCHOLARONE™  
Manuscripts

1  
2  
3  
4  
5 **1 TITLE PAGE**

6 **2 Title**

7 **3 Depression and anxiety in pet owners after a diagnosis of cancer in their pets: a**  
8 **4 cross-sectional study in Japan**

9  
10  
11 **5 Authors**

12 **6** Yuko Nakano <sup>1,2</sup>, Masato Matsushima <sup>2</sup>, Azusa Nakamori <sup>1</sup>, Junshiro Hiroma <sup>3</sup>, Eiji Matsuo <sup>4</sup>, Hidetaka  
13  
14 **7** Wakabayashi <sup>2,5</sup>, Shuhei Yoshida <sup>2,6</sup>, Hiroko Ichikawa <sup>2,7</sup>, Makoto Kaneko <sup>2,8</sup>, Rieko Mutai <sup>2,9</sup>, Yoshifumi  
15  
16 **8** Sugiyama <sup>2,10</sup>, Eriko Yoshida <sup>2,11</sup>, Tetsuya Kobayashi <sup>1</sup>

17 **9 Author affiliations**

- 18  
19 **10** <sup>1.</sup> Japan Small Animal Cancer Center, Japan Small Animal Medical Center, Tokorozawa, Japan  
20  
21 **11** <sup>2.</sup> Division of Clinical Epidemiology, Research Center for Medical Sciences, The Jikei University School of  
22  
23 **12** Medicine, Tokyo, Japan  
24  
25 **13** <sup>3.</sup> Minamino Veterinary Clinic, Hachioji, Japan  
26  
27 **14** <sup>4.</sup> Aster Animal Hospital, Kawaguchi, Japan  
28  
29 **15** <sup>5.</sup> Department of Rehabilitation Medicine, Yokohama City University Medical Center, Yokohama, Japan  
30  
31 **16** <sup>6.</sup> Department of Community-Based Medical System, Graduate School of Biomedical and Health Sciences,  
32  
33 **17** Hiroshima University, Hiroshima, Japan  
34  
35 **18** <sup>7.</sup> Division of Gastroenterology, Department of Internal Medicine, Eiju General Hospital, Tokyo, Japan  
36  
37 **19** <sup>8.</sup> Department of Family and Community Medicine, Hamamatsu University School of Medicine, Hamamatsu,  
38  
39 **20** Japan  
40  
41 **21** <sup>9.</sup> The Jikei University School of Nursing, Chofu, Japan  
42  
43 **22** <sup>10.</sup> Tarama Clinic, Okinawa Miyako Hospital, Miyakojima, Japan  
44  
45 **23** <sup>11.</sup> Kawasaki-Kyodo Hospital, Japanese Health and Welfare Co-operative Federation, Kawasaki, Japan  
46  
47  
48  
49  
50  
51  
52  
53  
54  
55  
56  
57  
58  
59  
60

**25 Corresponding author**

**26** Yuko Nakano  
**27** Japan Small Animal Cancer Center, 1-10-4, Higashi-tokorozawawada, Tokorozawa, Saitama 359-0023, Japan  
**28** Tel: +81-42-946-7313, Fax: +81-42-946-7329  
**29** Email: yuko-n@momo.so-net.ne.jp

**31 Word count**

**32** 4005

## 1 ABSTRACT

2 **Objective** To determine the presence and predictors of depression and anxiety in pet owners after a diagnosis  
3 of cancer in their pets.

4 **Design** Cross-sectional study.

5 **Setting** A veterinary medical center specialized in oncology for dogs and cats and two primary veterinary  
6 clinics in Japan.

7 **Participants** The participants for analysis were 99 owners of a pet with cancer diagnosis received in the past  
8 1–3 weeks and 94 owners of a healthy pet.

9 **Main outcome measures** Self-reported questionnaires were used to assess depression and anxiety.

10 Depression was assessed using the Center of Epidemiologic Studies Depression Scale, and anxiety was measured  
11 by using the State-Trait Anxiety Inventory-Form JYZ.

12 **Results** Depression scores were significantly higher in owners of a pet with cancer than owners of a healthy pet,  
13 even after adjustment for potential confounders ( $p < 0.001$ ). Within the owners of a pet with cancer, depression  
14 was significantly more common in those who were employed than those who were unemployed ( $p = 0.048$ ). State  
15 anxiety scores were significantly higher in owners of a pet with cancer than owners of a healthy pet, even after  
16 adjustment for potential confounders, including trait-anxiety scores ( $p < 0.001$ ). Furthermore, in owners of a pet  
17 with cancer, state anxiety was higher in owners with high trait anxiety ( $p < 0.001$ ) and in owners whose pets had  
18 a poor prognosis ( $p = 0.027$ ).

19 **Conclusion** The results indicate that some owners tended to become depressed and anxious after their pets had  
20 received a diagnosis of cancer. Employment may be a predictor of depression. High trait anxiety and a pet with a  
21 poor prognosis may increase owners' state anxiety. Including the pet in a family genogram and attention to the  
22 pet's health condition may be important considerations for family practice.

## 23 **Keywords**

24 family practice, depression, anxiety, pet cancer, family genogram

1  
2  
3  
4  
5  
6  
7  
8  
9  
10  
11  
12  
13  
14  
15  
16  
17  
18  
19  
20  
21  
22  
23  
24  
25  
26  
27  
28  
29  
30  
31  
32  
33  
34  
35  
36  
37  
38  
39  
40  
41  
42  
43  
44  
45  
46  
47  
48  
49  
50  
51  
52  
53  
54  
55  
56  
57  
58  
59  
60

**1 Strengths and limitations of this study**

- 2 ● This is the first report to investigate the psychological effects of a diagnosis of cancer in pets on owners.
- 3 ● This study is the interdisciplinary research between medicine and veterinary medicine, which has not been  
4 studied to date.
- 5 ● The study setting was limited to a referral secondary veterinary medical center specialized in oncology, so  
6 the generalizability of the results is not clear.

For peer review only

## 1 Introduction

2 Since 1973, the birthrate in Japan has continued to decline.[1] Meanwhile, a 2015 survey by the Japanese Pet  
3 Food Association determined that 19,791,000 dogs and cats are owned in Japan.[2] Furthermore, this report  
4 found that 14.1 % of families own dogs and 10.1 % own cats; of these, 78.9 % of dogs and 82.0 % of cats are  
5 raised in the house. Thus, with the declining birthrate, aging society, and a decrease in the number of household  
6 members in Japan, it is thought that dogs and cats are becoming treated as companion animals, that is, family  
7 members.

8 Most pet owners regard their companion animals as family members.[3] Companion animals often play an  
9 important role for individuals, couples, and families, and animals that become important family members can  
10 make patients comfortable.[4] Living with pets can have positive impacts on mental health, such as reducing the  
11 feeling of loneliness, depression, and anxiety.[5, 6] Furthermore, companion animals can provide benefits to pet  
12 owners with mental health problems through the intensity of connectivity with pet owners.[7] Conversely, pet  
13 ownership can also have negative effects on the management of mental health disorders, which relate to financial  
14 costs, housing situations, and mental burden, especially if pets are unruly.[8-11] Another negative aspect is the  
15 mourning after the loss of a domestic pet.[12-14] Furthermore, caregiver burden in owners of a pet with chronic  
16 or terminal disease has been reported.[15]

17 The roles and responsibilities of family members of human patients with cancer are significant because  
18 families are required to support and care for the patient and deal with social problems. Thus, family members can  
19 often feel a great burden. A survey of families of human patients with leukemia found that depression, measured  
20 by the Center for Epidemiologic Studies Depression Scale (CES-D), was higher than the healthy level.[16]  
21 Another study of families of human cancer patients found that physical symptoms, anxiety and insomnia, social  
22 activity disorders, and depression tendency, measured by the General Health Questionnaire Mental Health Survey,  
23 were also above healthy levels.[17] In particular, parents of childhood cancer patients experience high levels of  
24 anxiety and depression after receiving the diagnosis,[18] although their poor mental state may be alleviated by  
25 psychosocial support.[19]

26 Improvement in veterinary medical care techniques in recent years means that companion animals live longer,  
27 and the majority of dogs now die from cancer.[20] Studies conducted in the UK and Japan reported that the most  
28 common cause of death in dogs was cancer.[21-23] Therefore, there is a high likelihood that pet owners will at  
29 some point receive a diagnosis of cancer in their pets. However, no study has investigated whether pet owners  
30 experience depression or anxiety after such a diagnosis.

31 The aim of this study was to examine the psychological effects of a cancer diagnosis in pets on pet owners. We  
32 therefore investigated the presence of anxiety and depression after diagnosis and explored their predictors. Our

1 hypothesis was that owners of a dog or a cat diagnosed with cancer suffer from depression and anxiety that is  
2 similar to that experienced by family members of human cancer patients.

## 3 4 **Material and Methods**

### 5 **Study design and Setting**

6 The study design was a cross-sectional survey. Anxiety and depression scores in owners of a pet diagnosed  
7 with cancer were compared with those of owners of a healthy pet. The survey was conducted between August  
8 2013 and November 2016 at three veterinary clinics in Japan. Owners of a pet with cancer were recruited from  
9 the Japan Small Animal Cancer Center (JSACC) and owners of a healthy pet were recruited from the Minamino  
10 Veterinary Clinic and Aster Animal Hospital. The JSACC is a referral veterinary medical center specialized in  
11 oncology for dogs and cats located in Tokorozawa city, Saitama prefecture, next to Tokyo. A psychological  
12 counselor with a veterinarian license (AN) interviewed the pet owners at their first visit to the JSACC. The  
13 Minamino Veterinary Clinic and Aster Animal Hospital are primary veterinary clinics. When dogs and cats are  
14 diagnosed with cancer or suspected to have cancer at these two clinics, their owners can receive a referral to the  
15 JSACC if they wish. The Minamino Veterinary Clinic is located in Hachioji, Tokyo, and the Aster Animal  
16 Hospital is in Kawaguchi city, Saitama prefecture, and they are located approximately 25 km and 20 km from the  
17 JSACC, respectively. This study was designed and reported in line with the Strengthening the Reporting of  
18 Observational Studies in Epidemiology (STROBE) guidelines.[24]

### 19 20 **Participants**

#### 21 **Owners of a pet with cancer**

22 Pet owners were asked to participate in the study 1–3 weeks after their pets had received a cancer diagnosis at  
23 the JSACC. As a procedure, we set in advance the survey date when the counselor/veterinarian (AN) or  
24 veterinarian (YN) could investigate without hindrance for daily veterinary practice depending upon the number of  
25 patients reserved, which was limited to consultation days in oncology service. Owners of a pet with cancer were  
26 consecutively recruited on the survey date. YN and AN informed the owners of a pet with cancer of the purpose  
27 and methods of the study and assured them that their privacy would be protected and that they would not be  
28 disadvantaged if they did not agree to participate. Those who agreed to participate provided signed consent.  
29 Questionnaires were completed by the pet owners and collected in an envelope. All personal information was  
30 anonymized and questionnaires were labeled with an identification code.

1 The attending veterinarian predicted the survival time, and, for ethical reasons, cases in which the pet was  
2 unlikely to survive for more than a week were excluded. Namely, we considered it too invasive for owners  
3 notified of imminent death of their pets to be asked to participate.  
4

#### 5 **Owners of a healthy pet**

6 Pet owners who visited the Minamino Veterinary Clinic or Aster Animal Hospital for preventive medicines  
7 such as vaccination, heartworm prevention, or health promotion were asked to participate in the study on days  
8 when the survey could be conducted. The participants were intermittently recruited at both veterinary clinics as a  
9 convenient sample. Pet owners that agreed to take part in the survey were provided with details of the research in  
10 a written document. Completion of the questionnaire was considered as consent to participate in the study.  
11 Questionnaires were collected in an envelope in the same way as for owners of a pet with cancer.

12 Owners whose dog or cat had suffered from malignant tumor in the past or were currently suffering from  
13 malignant tumor were excluded. We also excluded owners whose pet had a disease that was deemed to be severe  
14 or life threatening by the attending veterinarian, which could have affected the psychological state of pet owners.  
15

16 In both groups, pet owners were over 20 years old.  
17

### 18 **Measurement and Variables**

#### 19 **Main Outcome: Depression**

20 Depressive symptoms were assessed using the Japanese version of the CES-D.[25] The CES-D is a self-report  
21 questionnaire developed by the National Institute of Mental Health for the purposes of identifying depressive  
22 disorder in people aged over 15 years.[26] The frequency of depressive symptoms in the week before the  
23 examination was assessed by 20 items that were scored on a 4-point scale (0 = rarely or never – less than 1 day, 1  
24 = some or little time – 1–2 days, 2 = occasionally or a moderate amount of times – 3–4 days, and 3 = most or all  
25 the time – 5–7 days). Total scores range from 0 to 60 and higher scores indicate more severe depressive  
26 symptoms. A CES-D score of 16 or higher was considered to indicate probable depression.[25, 26]

27 CES-D questionnaires that contained more than five items with missing data were excluded from the data  
28 analysis. If the number of unanswered items was four items or less, the average value of the answered items was  
29 assigned to the missing items.  
30

#### 31 **Main Outcome: State Anxiety**

1 Anxiety was assessed using the Japanese version of the State-Trait Anxiety Inventory-Form JYZ  
2 (STAI-JYZ).[27] The STAI is a self-report questionnaire that measures anxiety as an emotional state (state  
3 anxiety) and as individual characteristics (trait anxiety).[28] It consists of 40 questions with 20 items per category  
4 and scores range from 20 to 80. Responses are given on a 4-point Likert scale. State-anxiety items measure the  
5 respondent's anxiety level over the past two weeks, whereas trait-anxiety items measure the respondent's  
6 characteristic anxiety level. Higher scores indicate greater anxiety. The state-anxiety score is classified into 5  
7 grades ( $20 \leq 35$  = very low,  $35 \leq 45$  = low,  $45 \leq 55$  = moderate,  $55 \leq 65$  = high,  $65-80$  = very high). Respondents who  
8 scored over 55 were defined as the high anxiety group.[27, 28]

9 Missing responses to the 20 questions used to calculate the state-anxiety scores in the STAI questionnaire were  
10 dealt with in two ways, as follows: (1) the questionnaire was excluded from the data analysis; and (2) missing  
11 responses were assigned a score of 1 (low anxiety) for owners of a pet with cancer and 4 (high anxiety) for  
12 owners of a healthy pet.

#### 13 14 **Predictor variables: characteristics of participants and pets**

15 Age, gender, employment (employed or unemployed), animal species (dog or cat), caregiver (main or not  
16 main), number of people per household, number of animals per household, and bereavement experience with pets  
17 were obtained from a self-report questionnaire for all participants. "Employed" included either full-time or  
18 part-time workers. "Unemployed" also included retired persons, full-time housewives, those without an  
19 occupation, and those with temporary leave from their job.

20 The owners of a pet with cancer were also asked about the pet's prognosis (curable, survival for more than a  
21 year, from a few months to less than a year, or several weeks), and presence of pet's symptoms (anorexia, pain,  
22 and neurological conditions including convulsion and respiratory distress).

#### 23 24 **Study size**

25 Based on the hypothesis that pet owners have high levels of depression and state anxiety after their pets had  
26 received a diagnosis of cancer, the number of participants required was calculated in advance. Assuming state  
27 anxiety scores of 50 and 40 for owners of a pet with cancer and owners with a healthy pet, respectively, both each  
28 with a standard deviation of 11, we calculated the number of participants required to identify a statistically  
29 significant difference as 26 in each group ( $\alpha = 0.05$ ,  $\beta = 0.10$ ). In a multiple regression model, 20 samples are  
30 required for one variable.[29] This study included nine explanatory variables, so 180 participants were required.

#### 31 32 **Analysis and statistical methods**



1 For comparisons in demographic characteristics between owners of a pet with cancer and owners of a healthy  
2 pet, Wilcoxon's rank-sum test for parametric data or Student's *t* test for nonparametric data was used for  
3 continuous variables and Fisher's exact test was used for categorical variables.

4 Student's *t* test was used for between-group comparisons of parametric CES-D score and state and  
5 trait-anxiety (STAI) scores and Wilcoxon's rank-sum test for between-group comparisons of nonparametric  
6 CES-D score and state and trait-anxiety (STAI) scores. Fisher's exact test was used for between-group  
7 comparisons of the proportion of participants with a CES-D score of 16 or more for depression and the proportion  
8 of those with a STAI score of 55 or more for state anxiety.

9 Model 1: To evaluate the independent effects of cancer diagnosis on the CES-D (model 1-CESD) and state  
10 anxiety (model 1-STAI) scores, the regression model included gender, age, employment, animal species (dog or  
11 cat), caregiver, number of people/animals per household, bereavement experience with pets, and trait anxiety  
12 (model 1-STAI only) as potential confounders. The variance inflation factor was calculated to check  
13 multicollinearity.

14 Model 2: To identify factors associated with the CES-D (model 2-CESD) and state anxiety (model 2-STAI)  
15 scores in owners of a pet with cancer, the regression model included pet's prognosis (life expectancy from a few  
16 months to less than a year, or several weeks), presence of clinical symptoms, and factors that had a *P*-value of  
17 less than 0.2 in model 1.

18 A *P*-value of < 0.05 was considered to be statistically significant. All statistical analyses were performed using  
19 STATA/SE version 13.[30]

## 20 21 **Ethical considerations**

22 The research protocol was approved by the ethics committee of The Jikei University School of Medicine  
23 (Ethics number: 25-049 7184). A psychological counselor with a veterinarian license (AN) interviewed the pet  
24 owners at their first visit to the JSACC. In owners of a pet with cancer, counseling and/or medical consultation  
25 were supposed to be recommended for owners with high levels of depression and anxiety which were based on an  
26 attending veterinarian's decision at consultation.

## 27 28 **Patient and Public Involvement**

29 No participants were involved in the development of the research question, outcome measures, or design or  
30 implementation of the study. No participants were involved in the analysis or write up of the study. There are no  
31 plans to disseminate our overall results to the study participants.

## 1 **Results**

### 2 **Participants**

3 The questionnaires from 100 owners of a pet with cancer and 100 owners of a healthy pet were obtained. One  
4 owner of a pet with cancer was excluded for analysis due to missing data of some demographic variables. Six  
5 owners of a healthy pet were excluded for analysis due to the presence of past cancer history of pet (n=2), no  
6 information on past cancer history of pet (n=2), no response to CES-D/STAI (n=1), or exclusion criteria of age  
7 (n=1, we asked the mother to respond to questionnaires: however, her son responded). Data from a total of 193  
8 participants were analyzed (99 owners of a pet with cancer and 94 owners of a healthy pet). The participants'  
9 characteristics are shown in Table 1. Except for the number of animals per household, there were no significant  
10 differences between the two groups in demographic variables as shown in Table 1. The median period between  
11 notification of the cancer diagnosis and completion of the questionnaire survey in the owners of a pet with cancer  
12 was 14 days (range, 7–21 days).

**Table 1. Participant characteristics**

|                                  |                             | Owners of a pet with cancer | Owners of a healthy pet | <i>P</i> -value |
|----------------------------------|-----------------------------|-----------------------------|-------------------------|-----------------|
| Number of participants           |                             | 99                          | 94                      |                 |
| Age, median (range), y           |                             | 49 (21–75)                  | 46 (22–70)              | 0.144           |
| Gender                           | Male, no. (%)               | 26 (26.3)                   | 15 (16.0)               | 0.112           |
|                                  | Female, no. (%)             | 73 (73.7)                   | 79 (84.0)               |                 |
| Animal species                   | Dog, no. (%)                | 83 (83.8)                   | 84 (89.4)               | 0.297           |
|                                  | Cat, no. (%)                | 16 (16.2)                   | 10 (10.6)               |                 |
| Employment                       | Employed, no. (%)           | 68 (68.7)                   | 67 (71.3)               | 0.754           |
|                                  | Unemployed, no. (%)         | 31 (31.3)                   | 27 (28.7)               |                 |
| Caregiver                        | Main caregiver, no. (%)     | 83 (83.8)                   | 84 (89.4)               | 0.297           |
|                                  | Not main caregiver, no. (%) | 16 (16.2)                   | 10 (10.6)               |                 |
| Number of people per household   | 1, no. (%)                  | 7 (7.1)                     | 5 (5.3)                 | 0.768           |
|                                  | 2+, no. (%)                 | 92 (92.9)                   | 89 (94.7)               |                 |
| Number of animals per household, | 1, no. (%)                  | 57 (57.6)                   | 69 (73.4)               | 0.024           |
|                                  | 2+, no. (%)                 | 42 (42.4)                   | 25 (26.6)               |                 |
| Bereavement experience with pets | Yes, no. (%)                | 76 (76.8)                   | 68 (72.3)               | 0.511           |

Student's *t* test was used for comparison in age between two groups.

## Depression

Figure 1 shows the CES-D scores of the two groups. The median CES-D score was 13.34 (25–75 percentile: 7–23) in the owners of a pet with cancer (*n* = 98) and 8 (25–75 percentile: 3–12) in the owners of a healthy pet (*n* = 94). The distribution of the two groups was significantly different (Wilcoxon rank-sum test: *p* < 0.001). In addition, 39.8 % (39/98) of the owners of a pet with cancer scored 16 or higher on the CES-D, which was significantly higher than the proportion in the owners of a healthy pet (11.7 % [11/94], Fisher's exact test: *p* < 0.001). In the multiple regression analysis (model 1-CESD), CES-D scores were significantly higher in the owners of a pet with cancer even after adjustment for potential confounders (*p* < 0.001, Table 2). Among the owners of a pet with cancer, owners who were employed had significantly higher depression scores than those who were unemployed (model 2-CESD) (*p* < 0.048, Table 3).

**Table 2. Multiple regression analysis of CES-D scores (model 1-CESD)**

|                          | Coefficient | 95% Confidence interval |        | P-value |
|--------------------------|-------------|-------------------------|--------|---------|
| Pet with cancer          | 7.948       | 5.493                   | 10.403 | < 0.001 |
| Age                      | -0.038      | -0.149                  | 0.072  | 0.495   |
| Female                   | 2.601       | -0.722                  | 5.925  | 0.124   |
| Dog                      | 1.577       | -2.034                  | 5.188  | 0.390   |
| Employed                 | 3.045       | 0.310                   | 5.779  | 0.029   |
| Main caregiver           | -0.786      | -4.663                  | 3.091  | 0.690   |
| 2+ persons per household | 0.980       | -4.113                  | 6.074  | 0.705   |
| 2+ animals per household | -1.246      | -3.911                  | 1.418  | 0.357   |
| Bereavement of a pet     | -0.674      | -3.522                  | 2.172  | 0.641   |

**Table 3. Analysis of predictors associated with depression among the cancer group (model 2-CESD)**

|           | Coefficient | 95% Confidence interval |       | P-value |
|-----------|-------------|-------------------------|-------|---------|
| Female    | 3.799       | -0.602                  | 8.200 | 0.090   |
| Employed  | 4.224       | 0.029                   | 8.419 | 0.048   |
| Prognosis | 3.499       | -0.446                  | 7.445 | 0.081   |
| Symptoms  | -0.927      | -4.993                  | 3.139 | 0.652   |

**State Anxiety (STAI scores)**

The state-anxiety and trait-anxiety scores of the two groups are shown in Figures 2A and 2B. For the cases in which all 20 questions for state anxiety were answered, the median state-anxiety score was 52 (25–75 percentile: 43–59) in the owners of a pet with cancer (n = 93) and 33 (25–75 percentile: 27–42) in the owners of a healthy pet (n = 91). The distribution of the two groups was significantly different (Wilcoxon rank-sum test:  $p < 0.001$ ). The proportion of owners with levels of high anxiety in the owners of a pet with cancer was 39.8 % (37/93),

1 which was significantly higher than 0 % (0/91) in the owners of a healthy pet (Fisher's exact test:  $p < 0.001$ ).  
 2 Similarly, when missing values were imputed, the median state-anxiety score was 52 (25–75 percentile: 43–58)  
 3 in the owners of a pet with cancer ( $n = 98$ ), which was significantly higher than 33.5 (25–75 percentile: 27–42) in  
 4 the owners of a healthy pet ( $n = 92$ ) ( $p < 0.001$ ). The median trait-anxiety score was 45 (25–75 percentile: 37–  
 5 52.5) in the owners of a pet with cancer ( $n = 96$ ) and 34.5 (25–75 percentile: 27–42) in the owners of a healthy  
 6 pet ( $n = 90$ ). The distribution of the two groups was significantly different ( $p < 0.001$ ).

7 In the multiple regression model, after adjustment for potential confounders including trait-anxiety scores,  
 8 state-anxiety scores were significantly higher in the owners of a pet with cancer than in owners of a healthy pet  
 9 (model 1-STAI) ( $p < 0.001$ , Table 4). Furthermore, in the owners of a pet with cancer, state-anxiety scores were  
 10 higher in owners with high trait anxiety ( $p < 0.001$ ) and in those with pets with a life expectancy of several  
 11 months (model 2-STAI) ( $p = 0.027$ , Table 5).

12  
 13 **Table 4. Multiple regression analysis of state-anxiety scores (model 1-STAI)**

|                          | Coefficient | 95% Confidence interval |        | <i>P</i> -value |
|--------------------------|-------------|-------------------------|--------|-----------------|
| Pet with cancer          | 11.056      | 8.510                   | 13.601 | < 0.001         |
| Age                      | -0.043      | -0.148                  | 0.060  | 0.409           |
| Female                   | -0.511      | -3.544                  | 2.522  | 0.740           |
| Dog                      | -0.849      | -4.160                  | 2.461  | 0.613           |
| Employed                 | 1.495       | -1.041                  | 4.032  | 0.246           |
| Main caregiver           | -0.387      | -3.939                  | 3.164  | 0.830           |
| 2+ persons per household | 3.676       | -0.886                  | 8.238  | 0.114           |
| 2+ animals per household | 0.463       | -2.050                  | 2.976  | 0.717           |
| Bereavement of a pet     | 1.388       | -1.216                  | 3.993  | 0.294           |
| Trait anxiety            | 0.654       | 0.546                   | 0.761  | < 0.001         |

14  
 15  
 16  
 17  
 18  
 19  
 20  
 21  
 22  
 23  
 24  
 25  
 26  
 27  
 28  
 29 **Table 5. Analysis of predictors associated with state anxiety within the cancer group (model 2-STAI)**

|  | Coefficient | 95% Confidence interval |  | <i>P</i> -value |
|--|-------------|-------------------------|--|-----------------|
|--|-------------|-------------------------|--|-----------------|

|   |                          |       |        |        |         |
|---|--------------------------|-------|--------|--------|---------|
| 1 | 2+ persons per household | 3.614 | -3.089 | 10.319 | 0.287   |
| 2 | Trait anxiety            | 0.570 | 0.405  | 0.734  | < 0.001 |
| 3 | Prognosis                | 4.318 | 0.508  | 8.128  | 0.027   |
| 4 | Symptoms                 | 3.307 | -0.543 | 7.157  | 0.091   |

---

## Discussion

The present study revealed high levels of anxiety and depression among owners of pets that had received a diagnosis of cancer. Within the owners of a pet with cancer, depression was significantly more common in those who were employed than those who were unemployed. The state anxiety was higher in owners with high trait anxiety and in owners of a pet with a poor prognosis. This is the first report to investigate the psychological effects of pet cancer on their owners.

After being notified that their dog or cat had cancer, 39.8% of owners reported symptoms of depression. Two previous studies that investigated depression among family members of cancer patients using the CES-D found that 52.9 % and 66.4 % of families reported symptoms of depression, respectively.[31, 32] Although pet owners were less likely to suffer depression than the family members of cancer patients, almost 40 % were affected.

Owners who were employed were more likely to report depression symptoms than those who were unemployed. Insufficient time available to care for their pets and visit a veterinary clinic due to working hours may have led to a sense of guilt. This feeling is likely similar to guilt felt when a pet owner with mental health problems cannot manage unruly pets.[8-11] Furthermore, a previous study reported that the median CES-D score of owners of a pet with chronic or terminal diseases was 19.87,[15] which was higher than the median of 13.34 in this study, which was measured 1–3 weeks after the notification of pet cancer. Owners' depression may be sustained or increased by the need to provide long-term nursing care for their pets. Therefore, psychosocial support from the early stage after notification is necessary so that these owners do not develop maladjustment or mood disorder.

The median state-anxiety score among owners of a pet with cancer was 52, which was significantly higher than the median of 33.5 among owners of a healthy pet. Studies that have used the STAI to measure anxiety in parents of children diagnosed with cancer reported average state-anxiety scores of 56.7 and 52.7 for mothers and fathers, respectively.[33] The similarity in the state-anxiety scores of owners of a pet with cancer suggests that dogs and cats may play a role as a member of the family. The high anxiety in owners of a pet with cancer could have been caused by the cost of treatment, the burden of taking the pet to the clinic, providing nursing care, anxiety about death of a pet, and deterioration of clinical symptoms such as changes in the pet's appearance or increased pain.

1  
2  
3  
4  
5 1 In this study, anxiety was higher among owners who had a pet with a poor prognosis; i.e., with a life  
6 2 expectancy from several weeks to less than a year, which suggests that anxiety increases as the prospect of  
7 3 bereavement becomes more immediate. Furthermore, owners with high trait anxiety were more likely to suffer  
8 4 from state anxiety than owners with low trait anxiety. A previous study revealed that cancer patients with high  
9 5 trait anxiety experience stronger psychological distress such as tension and anxiety after a diagnosis of cancer  
10 6 than patients with low trait anxiety.[34] Therefore, trait anxiety may be one factor that affects the state anxiety of  
11 7 owners when their pets are diagnosed with cancer. Moreover, trait anxiety scores in owners of a pet with cancer  
12 8 were significantly higher than those in owners of a healthy pet (45 vs. 34.5,  $p < 0.001$ ). Although trait anxiety, a  
13 9 personality trait that tends to cause anxiety, is relatively stable, the high trait anxiety seen in owners of a pet with  
14 10 cancer may have been caused by the state anxiety induced by their pet's cancer diagnosis.

11 11 The results of our study are consistent with the idea that companion animals are regarded as important family  
12 12 members, as found by previous studies [3, 4, 35] because there is similarity between the degree of anxiety after  
13 13 notification of pet cancer and that of human cancer. Baker et al. reported that the relationships between typical  
14 14 pet owners/dog enthusiasts and companion dogs were similar to relationships with a spouse, child, and parents;  
15 15 this research measured the distance between pet owners and pets, and owners and family members, using the  
16 16 Family Life Space Diagram.[35] Furthermore, previous studies have noted that pets should be included in the  
17 17 family genogram.[36, 37] Including pets in a family genogram may be useful for medical treatment in  
18 18 family-oriented care by family physicians. Therefore, we propose that the following information about  
19 19 companion animals should be entered into the family genogram: name, age, animal species, current medical  
20 20 history, animal's prognosis, and relationship with the family. Family physicians should pay attention to the health  
21 21 condition of companion animals. In addition, family physicians should recognize the social environment of pet  
22 22 owners, such as employment status. It is important not only for family physicians but also for psychiatrists to  
23 23 consider the possibility that owners of a pet with cancer may be suffering from depression and anxiety and may  
24 24 need mental health care. Our study is the first attempt to describe the psychological impact such as depression  
25 25 and anxiety on the pet owners after notification of pet cancer. This information is necessary for family physicians  
26 26 who see a patient with depressive and/or anxiety feelings as the first encounter. Also, this is an important  
27 27 message for veterinarians because they should pay more attention to tell the bad news more carefully and  
28 28 consider the impact on pet owners.

29 29 One limitation of this study is the generalizability of results because the study setting was limited to a referral  
30 30 secondary veterinary medical center specialized in oncology in an urban area. Therefore, we cannot rule out the  
31 31 possibility that originally enthusiastic owners and owners with a tendency toward depression and high trait  
32 32 anxiety were more likely to visit the referral veterinary medical center. The proportion of pet owners with

1 depression and anxiety may be lower than that identified in the present study when conducting surveys in all area  
2 of Japan, including the countryside, and surveys conducted at a primary care clinic. Second, while our results are  
3 valid in Japanese culture, they remain to be replicated in other cultures. Similar results may be obtained in  
4 countries in which pets are treated as family members. Third, we used convenience sampling rather than  
5 consecutive sampling, which may have led to a selection bias. In addition, because a screening test for depression  
6 was used in this study, it was uncertain whether the participants had developed an actual mental disorder. The  
7 progression of depression and anxiety over the long term is also unknown, as the investigation took place 1–3  
8 weeks after notification of the diagnosis. The detailed processes that cause depression and anxiety may be  
9 elucidated by investigating depression and anxiety in owners of a pet diagnosed with cancer at primary veterinary  
10 clinics and monitoring them over time. Interventions such as counselling for pet owners after notification of a  
11 cancer diagnosis should also be considered.

## 13 **Conclusion**

14 Our findings indicate that some owners tended to become depressed and anxious after their pets had received a  
15 diagnosis of cancer. Owners who were employed had a higher rate of depression than those who were  
16 unemployed, and state anxiety was higher in owners with high trait anxiety and in those whose pets had a poor  
17 prognosis. Physicians may find it helpful to include pets in the family genogram and to consider the pets' health  
18 condition when providing medical treatment in family practice.

## 20 **Acknowledgements**

21 We are grateful to Dr. Masamine Takanosu, Nasunogahara Veterinary Clinic, for his kind advice and critical  
22 reading of the manuscript. We also thank Dr. Takuto Segawa, Dr. Ryoko Yamato and Dr. Satomi Kajiwara for  
23 collecting the data. We are grateful to the pet owners who participated in this study. Finally, I (YN) would like to  
24 express my gratitude to my family for their warm encouragement.

## 26 **Footnotes**

### 27 **Author contributions**

28 YN conceived and designed the study, analyzed and interpreted the data, and drafted the manuscript. MM  
29 contributed to the conception and design of the study and analysis and interpretation of the data. AN, JH, and EM  
30 contributed to the conception of the study and acquisition of the data. HW, SY, HI, MK, RM, YS, and EY  
31 contributed to the interpretation of the data and discussions to help draft the manuscript. TK contributed to the



1 conception of the study. All authors critically revised the manuscript. All authors approved the final version of  
2 the manuscript and agree to be accountable for the accuracy of the work. YN is the guarantor.

#### 3 4 **Funding**

5 This study was supported by a grant for post-graduate students from Jikei University School of Medicine. The  
6 study sponsor had no role in the study design, data collection, analysis, or interpretation, writing the report, or the  
7 decision to submit the article for publication.

#### 8 9 **Competing interests**

10 All authors have completed the ICMJE uniform disclosure form at [www.icmje.org/coi\\_disclosure.pdf](http://www.icmje.org/coi_disclosure.pdf) and  
11 declare that they received no support from any organization for the submitted work; MM received a lecture fee  
12 from the Japan Small Animal Medical Center, MM is an adviser of the Centre for Family Medicine Development  
13 practice-based research network, MM received a lecture fee and lecture travel fee from the Centre for Family  
14 Medicine Development, MM received a grant from the Japan Society for the Promotion of Science, and MM is a  
15 Program Director of the Jikei Clinical Research Program for Primary-care; there are no other relationships or  
16 activities that could appear to have influenced the submitted work.

#### 17 18 **Patient consent**

19 Not required.

#### 20 21 **Ethical approval**

22 The ethics committee of The Jikei University School of Medicine approved study protocols (Ethics number:  
23 25-049 7184).

#### 24 25 **Provenance and peer review**

26 Not commissioned; externally peer reviewed.

#### 27 28 **Data sharing statement**

29 No additional data are available.

30  
31 This is an Open Access article distributed in accordance with the Creative Commons Attribution Non  
32 Commercial (CC BY-NC 4.0) license, which permits others to distribute, remix, adapt, build upon this work

1  
2  
3  
4  
5  
6  
7  
8  
9  
10  
11  
12  
13  
14  
15  
16  
17  
18  
19  
20  
21  
22  
23  
24  
25  
26  
27  
28  
29  
30  
31  
32  
33  
34  
35  
36  
37  
38  
39  
40  
41  
42  
43  
44  
45  
46  
47  
48  
49  
50  
51  
52  
53  
54  
55  
56  
57  
58  
59  
60

1 non-commercially, and license their derivative works on different terms, provided the original work is properly  
2 cited and the use is non-commercial. See: <http://creativecommons.org/licenses/by-nc/4.0/>.  
3

For peer review only

## 1     **References**

- 2     1     Ministry of Health, Labour and Welfare, Japan. Live Births specified on Report of Vital Statistics in FY2010.  
3     [https://www.mhlw.go.jp/english/database/db-hw/FY2010/live\\_births.html](https://www.mhlw.go.jp/english/database/db-hw/FY2010/live_births.html) (accessed 18 Oct 2018)
- 4     2     Japan Pet Food Association. Industry's annual national pet owner survey 2015. [In Japanese]
- 5     3     Cohen SP. Can pets function as family members? *West J Nurs Res* 2002;24:621–38.
- 6     4     Walsh F. Human-animal bonds I: the relational significance of companion animals. *Fam Process*  
7     2009;48:462–80.
- 8     5     Zasloff RL, Kidd AH. Loneliness and pet ownership among single women. *Psychol Rep* 1994;75:747–52.
- 9     6     Fritz CL, Farver TB, Hart LA. Companion animals and the psychological health of Alzheimer patients'  
10    caregivers. *Psychol Rep* 1996;78:467–81.
- 11    7     Brooks HL, Rushton K, Lovell K. The power of support from companion animals for people living with  
12    mental health problems: as systematic review and narrative synthesis of the evidence. *BMC Psychiatry*  
13    2018;18. doi: 10.1186/s12888-018-1613-2
- 14    8     Brooks HL, Rushton K, Walker S. Ontological security and connectivity provided by pets: a study in the  
15    self-management of the everyday lives of people diagnosed with a long-term mental health condition. *BMC*  
16    *Psychiatry* 2016;16:409.
- 17    9     Wells DL. Associations between pet ownership and self-reported health status in people suffering from  
18    chronic fatigue syndrome. *J Altern Complement Med* 2009;15:407–13.
- 19    10    Zimolag U, Kropa T. The occupation of pet ownership as an enabler of community integration in serious  
20    mental illness: a single exploratory case study. *Occup Ther Ment Health* 2010;26:176–96.
- 21    11    Zimolag U, Kropa T. Pet ownership as a meaningful community occupation for people with serious mental  
22    illness. *Am J Occup Ther* 2009;63:126–37.
- 23    12    Keddie KM. Pathological mourning after the death of a domestic pet. *Br J Psychiatry* 1977;131:21–25.
- 24    13    Wrobel TA, Dye AL. Grieving pet death: normative, gender, and attachment issues. *Omega (Westport)*  
25    2003;47:385–93.

- 1  
2  
3  
4  
5 1 14 Adams CL, Bonnett BN, Meek AH. Predictors of owner response to companion animal death in 177 clients  
6 2 from 14 practices in Ontario. *J Am Vet Med Assoc* 2000;217:1303–9.  
7  
8  
9 3 15 Spitznagel MB, Jacobson DM, Cox MD, et al. Caregiver burden in owners of a sick companion animal: A  
10 4 cross-sectional observational study. *Vet Rec* 2017;181:321.  
11  
12  
13 5 16 Shapiro J, Perez M, Warden MJ. The importance of family functioning to caregiver adaptation in mothers of  
14 6 child cancer patients: testing a social ecological model. *J Pediatr Oncol Nurs* 1998;15:47–54.  
15  
16  
17 7 17 Payne S, Smith P, Dean S. Identifying the concerns of informal carers in palliative care. *Palliat Med*  
18 8 1999;13:37–44.  
19  
20  
21 9 18 Sawyer M, Antoniou G, Toogood I, et al. Childhood cancer: a 4-year prospective study of the psychological  
22 10 adjustment of children and parents. *J Pediatr Hematol Oncol* 2000;22:214–20.  
23  
24  
25 11 19 Gerhardt CA, Compas BE, Connor JK, et al. Association of a mixed anxiety-depression syndrome and  
26 12 symptoms of major depressive disorder during adolescence. *J Youth Adolesc* 1999;28:305–23.  
27  
28  
29  
30 13 20 Fleming JM, Creevy KE, Promislow DE. Mortality in North American dogs from 1984 to 2004: an  
31 14 investigation into age-, size-, and breed-related causes of death. *J Vet Intern Med* 2011;25(2):187–98.  
32  
33 15 21 Adams VJ, Evans KM, Sampson J, et al. Methods and mortality results of a health survey of purebred dogs  
34 16 in the UK. *J Small Anim Pract* 2010;51:512–24.  
35  
36 17 22 O'Neill DG, Church DB, McGreevy PD, et al. Longevity and mortality of owned dogs in England. *Vet J*  
37 18 2013;198:638–43.  
38  
39 19 23 Inoue M, Hasegawa A, Hosoi Y, et al. A current life table and causes of death for insured dogs in Japan. *Prev*  
40 20 *Vet Med* 2015;120:210–8.  
41  
42  
43 21 24 [http://www.equator-network.org/wp-content/uploads/2015/10/STROBE\\_checklist\\_v4\\_cross-sectional.pdf](http://www.equator-network.org/wp-content/uploads/2015/10/STROBE_checklist_v4_cross-sectional.pdf)  
44 22 (accessed 18 Oct 2018)  
45  
46 23 25 Shima S, Shikano T, Kitamura T, et al. A new self-rating depression scale. *Psychiatry* 1985;27:717–23. (in  
47 24 Japanese)  
48  
49  
50 25 26 Radloff LS. The CES-D scale a self-report depression scale for research in the general population. *Appl*  
51 26 *Psychol Meas* 1977;1:385–401.  
52  
53  
54  
55  
56  
57  
58  
59  
60

- 1  
2  
3  
4 1 27 Hidano N, Fukuhara M, Iwawaki M, et al. Manual for the State-Trait Anxiety Inventory-Form JYZ. Jitsumu  
5  
6 2 Kyoiku-Shuppan 2000 (in Japanese).  
7  
8 3 28 Spielberger CD, Gorsuch RL, Lushene R, et al. Manual for the State-Trait Anxiety Inventory-Form Y. Palo  
9  
10 4 Alto, CA: Consulting Psychologists Press 1983.  
11  
12 5 29 Feinstein AR. Multivariable Analysis: An Introduction. New Haven, CT: Yale University Press 1996.  
13  
14 6 30 StataCorp. Stata Statistical Software: Release 13. College Station, StataCorp LP 2013.  
15  
16 7 31 Carter PA, Chang BL. Sleep and depression in cancer caregivers. *Cancer Nurs* 2000;23:410–5.  
17  
18 8 32 Papastavrou E, Charalambous A, Tsangari H. Exploring the other side of cancer care: the informal  
19  
20 9 caregiver. *Eur J Oncol Nurs* 2009;13:128–36.  
21  
22 10 33 Dahlquist LM, Czyzewski DI, Copeland KG, et al. Parents of children newly diagnosed with cancer: anxiety,  
23  
24 11 coping, and marital distress. *J Pediatr Psychol* 1993;18:365–76.  
25  
26 12 34 Ando N, Iwamitsu Y, Kuranami M, et al. Psychological characteristics and subjective symptoms as  
27  
28 13 determinants of psychological distress in patients prior to breast cancer diagnosis. *Support Care Cancer*  
29  
30 14 2009;17:1361–70.  
31  
32 15 35 Barker SB, Barker RT, Dawson KS. The use of the family life space diagram in establishing  
33  
34 16 interconnectedness: a preliminary study of sexual abuse survivors, their significant others, and pets.  
35  
36 17 *Individual Psychology* 1997;53:435–50.  
37  
38 18 36 McGoldrick M, Gerson R, Petry S. Genograms: assessment and intervention. 3rd ed. WW Norton &  
39  
40 19 Company, New York 2008.  
41  
42 20 37 Walsh F. Human-animal bonds II: the role of pets in family systems and family therapy. *Fam Process*  
43  
44 21 2009;48:481–99.  
45  
46 22

1  
2  
3  
4  
5  
6  
7  
8  
9  
10  
11  
12  
13  
14  
15  
16  
17  
18  
19  
20  
21  
22  
23  
24  
25  
26  
27  
28  
29  
30  
31  
32  
33  
34  
35  
36  
37  
38  
39  
40  
41  
42  
43  
44  
45  
46  
47  
48  
49  
50  
51  
52  
53  
54  
55  
56  
57  
58  
59  
60

1 **Figure 1. Distribution of CES-D scores in the owners of a health pet and the owners of a pet with cancer**

2 The solid line shows the median CES-D score in each group. The dotted line shows the cut-off point for  
3 depression.

4  
5  
6  
7  
8  
9  
10  
11  
12  
13  
14  
15  
16  
17  
18  
19  
20  
21  
22  
23  
24  
25  
26  
27  
28  
29  
30  
31  
32  
33  
34  
35  
36  
37  
38  
39  
40  
41  
42  
43  
44  
45  
46  
47  
48  
49  
50  
51  
52  
53  
54  
55  
56  
57  
58  
59  
60

5 **Figure 2. Distribution of state-anxiety (A) and trait-anxiety (B) scores in the owners of a healthy pet and  
6 the owners of a pet with cancer**

7 The solid lines show the median anxiety score in each group. A: the median state-anxiety score was moderate in  
8 the owners of a pet with cancer, but very low in the owners of a healthy pet. B: the median trait-anxiety score in  
9 the owners of a pet with cancer was higher than in the owners of a healthy pet.

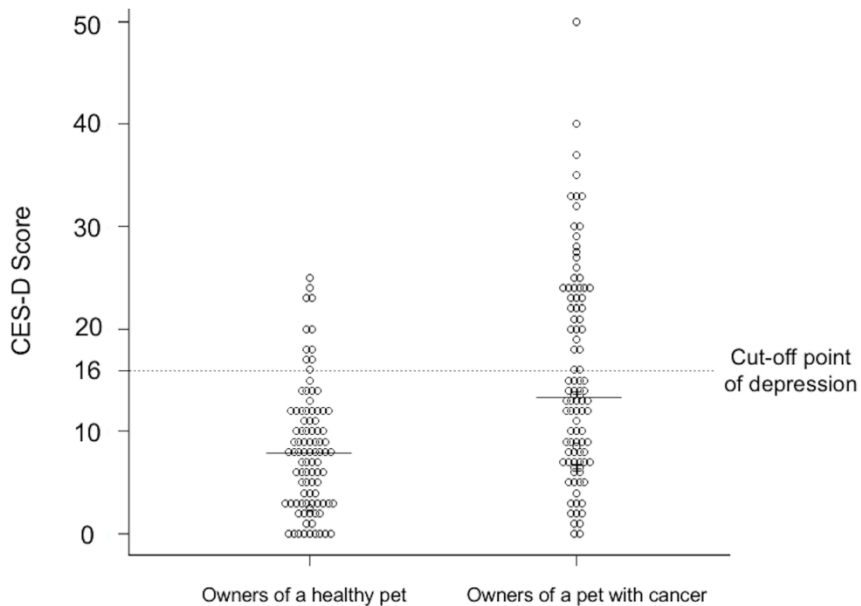

Figure 1. Distribution of CES-D scores in the owners of a health pet and the owners of a pet with cancer. The solid line shows the median CES-D score in each group. The dotted line shows the cut-off point for depression.

89x67mm (600 x 600 DPI)

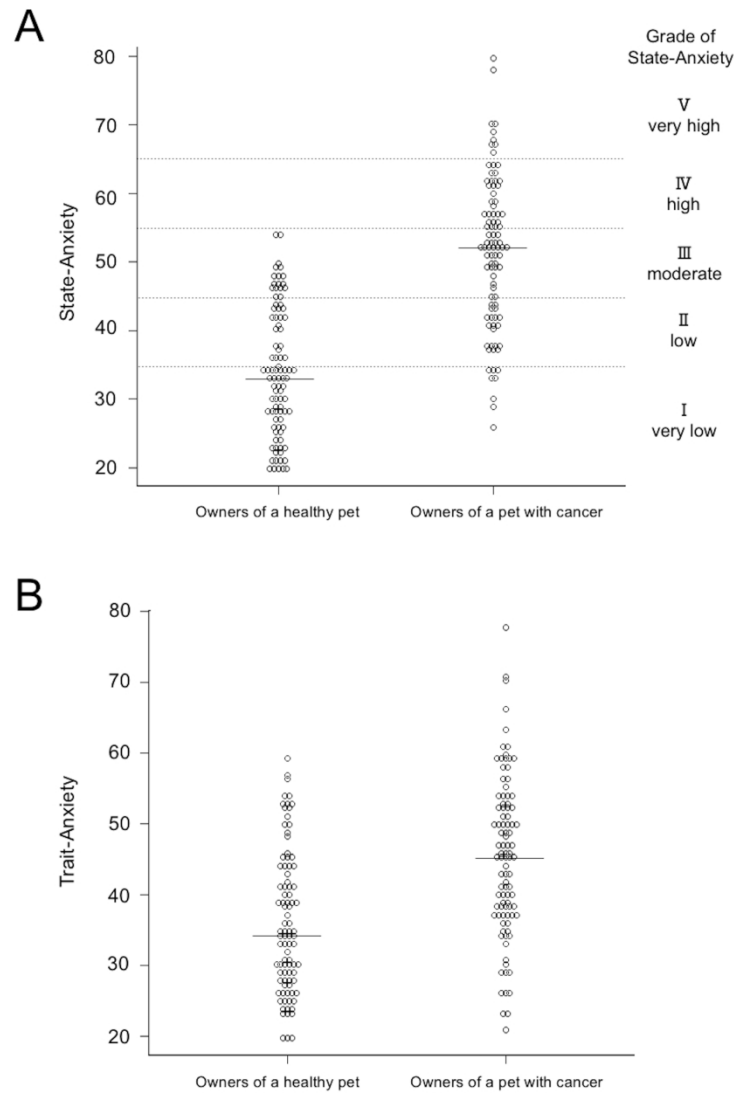

45 Figure 2. Distribution of state-anxiety (A) and trait-anxiety (B) scores in the owners of a healthy pet and the  
46 owners of a pet with cancer

47 The solid lines show the median anxiety score in each group. A: the median state-anxiety score was  
48 moderate in the owners of a pet with cancer, but very low in the owners of a healthy pet. B: the median  
49 trait-anxiety score in the owners of a pet with cancer was higher than in the owners of a healthy pet.

50  
51 90x134mm (600 x 600 DPI)



**STROBE 2007 (v4) Statement—Checklist of items that should be included in reports of *cross-sectional studies***

| Section/Topic                | Item # | Recommendation                                                                                                                                                                       | Reported on page # |
|------------------------------|--------|--------------------------------------------------------------------------------------------------------------------------------------------------------------------------------------|--------------------|
| Title and abstract           | 1      | (a) Indicate the study's design with a commonly used term in the title or the abstract                                                                                               | 1, 3               |
|                              |        | (b) Provide in the abstract an informative and balanced summary of what was done and what was found                                                                                  | 3                  |
| <b>Introduction</b>          |        |                                                                                                                                                                                      |                    |
| Background/rationale         | 2      | Explain the scientific background and rationale for the investigation being reported                                                                                                 | 4                  |
| Objectives                   | 3      | State specific objectives, including any prespecified hypotheses                                                                                                                     | 4                  |
| <b>Methods</b>               |        |                                                                                                                                                                                      |                    |
| Study design                 | 4      | Present key elements of study design early in the paper                                                                                                                              | 5                  |
| Setting                      | 5      | Describe the setting, locations, and relevant dates, including periods of recruitment, exposure, follow-up, and data collection                                                      | 5                  |
| Participants                 | 6      | (a) Give the eligibility criteria, and the sources and methods of selection of participants                                                                                          | 5                  |
| Variables                    | 7      | Clearly define all outcomes, exposures, predictors, potential confounders, and effect modifiers. Give diagnostic criteria, if applicable                                             | 5, 6               |
| Data sources/<br>measurement | 8*     | For each variable of interest, give sources of data and details of methods of assessment (measurement). Describe comparability of assessment methods if there is more than one group | 5, 6               |
| Bias                         | 9      | Describe any efforts to address potential sources of bias                                                                                                                            | 7                  |
| Study size                   | 10     | Explain how the study size was arrived at                                                                                                                                            | 6, 7               |
| Quantitative variables       | 11     | Explain how quantitative variables were handled in the analyses. If applicable, describe which groupings were chosen and why                                                         | 7                  |
| Statistical methods          | 12     | (a) Describe all statistical methods, including those used to control for confounding                                                                                                | 7                  |
|                              |        | (b) Describe any methods used to examine subgroups and interactions                                                                                                                  | N/A                |
|                              |        | (c) Explain how missing data were addressed                                                                                                                                          | 7                  |
|                              |        | (d) If applicable, describe analytical methods taking account of sampling strategy                                                                                                   | 9                  |
|                              |        | (e) Describe any sensitivity analyses                                                                                                                                                | N/A                |
| <b>Results</b>               |        |                                                                                                                                                                                      |                    |

|                          |     |                                                                                                                                                                                                              |               |
|--------------------------|-----|--------------------------------------------------------------------------------------------------------------------------------------------------------------------------------------------------------------|---------------|
| Participants             | 13* | (a) Report numbers of individuals at each stage of study—eg numbers potentially eligible, examined for eligibility, confirmed eligible, included in the study, completing follow-up, and analysed            | N/A           |
|                          |     | (b) Give reasons for non-participation at each stage                                                                                                                                                         | N/A           |
|                          |     | (c) Consider use of a flow diagram                                                                                                                                                                           | N/A           |
| Descriptive data         | 14* | (a) Give characteristics of study participants (eg demographic, clinical, social) and information on exposures and potential confounders                                                                     | 9             |
|                          |     | (b) Indicate number of participants with missing data for each variable of interest                                                                                                                          | 9             |
| Outcome data             | 15* | Report numbers of outcome events or summary measures                                                                                                                                                         | 9, 10, 11     |
| Main results             | 16  | (a) Give unadjusted estimates and, if applicable, confounder-adjusted estimates and their precision (eg, 95% confidence interval). Make clear which confounders were adjusted for and why they were included | 9, 10, 11, 12 |
|                          |     | (b) Report category boundaries when continuous variables were categorized                                                                                                                                    | N/A           |
|                          |     | (c) If relevant, consider translating estimates of relative risk into absolute risk for a meaningful time period                                                                                             | N/A           |
| Other analyses           | 17  | Report other analyses done—eg analyses of subgroups and interactions, and sensitivity analyses                                                                                                               | N/A           |
| <b>Discussion</b>        |     |                                                                                                                                                                                                              |               |
| Key results              | 18  | Summarise key results with reference to study objectives                                                                                                                                                     | 12            |
| Limitations              | 19  | Discuss limitations of the study, taking into account sources of potential bias or imprecision. Discuss both direction and magnitude of any potential bias                                                   | 13            |
| Interpretation           | 20  | Give a cautious overall interpretation of results considering objectives, limitations, multiplicity of analyses, results from similar studies, and other relevant evidence                                   | 13, 14        |
| Generalisability         | 21  | Discuss the generalisability (external validity) of the study results                                                                                                                                        | 13,14         |
| <b>Other information</b> |     |                                                                                                                                                                                                              |               |
| Funding                  | 22  | Give the source of funding and the role of the funders for the present study and, if applicable, for the original study on which the present article is based                                                | 14            |

\*Give information separately for cases and controls in case-control studies and, if applicable, for exposed and unexposed groups in cohort and cross-sectional studies.

**Note:** An Explanation and Elaboration article discusses each checklist item and gives methodological background and published examples of transparent reporting. The STROBE checklist is best used in conjunction with this article (freely available on the Web sites of PLoS Medicine at <http://www.plosmedicine.org/>, Annals of Internal Medicine at <http://www.annals.org/>, and Epidemiology at <http://www.epidem.com/>). Information on the STROBE Initiative is available at [www.strobe-statement.org](http://www.strobe-statement.org).
